# Supplementary material
Source: MDPI journal article supplement (https://www.mdpi.com/1424-8247/15/6/687)
Supplement: s1 [file s1]

## Supplementary Materials

# In Silico Antiprotozoal Evaluation of 1.4-Naphthoquinone Derivatives against Chagas and Leishmaniasis Diseases Using QSAR, Molecular Docking, and ADME Approaches

Lina S. Prieto Cárdenas <sup>1</sup>, Karen A. Arias Soler <sup>1</sup>, Diana L. Nossa González <sup>1</sup>, Wilson E. Rozo Núñez <sup>1</sup>, Agobardo Cárdenas-Chaparro <sup>1</sup>, Pablo R. Duchowicz <sup>2</sup>, and Jovanny A. Gómez Castaño <sup>1,\*</sup>

<sup>1</sup> Grupo Química-Física Molecular y Modelamiento Computacional (QUIMOL), Facultad de Ciencias, Universidad Pedagógica y Tecnológica de Colombia (UPTC), Avenida Central del Norte, Tunja, Boyacá 050030, Colombia; grupo.quimol@uptc.edu.co

<sup>2</sup> Instituto de Investigaciones Fisicoquímicas Teóricas y Aplicadas (CONICET – Universidad Nacional de La Plata). Diagonal 113 y calle 64. C.C. 16. Sucursal 4. 1900. La Plata, Provincia de Buenos Aires, Argentina

\* Correspondence: jovanny.gomez@uptc.edu.co

**Table S1.** Antiparasitic QSAR models for chagas and leishmaniasis protozoa based on naphthoquinone derivatives obtained by the replacement method. Best models in bold.

| Model                      | N° | Descriptors                                                                                                                                                                          | R <sup>2</sup> <sub>train</sub> | RMSE <sub>train</sub> | R <sup>2</sup> <sub>val</sub> | RMSE <sub>val</sub> |
|----------------------------|----|--------------------------------------------------------------------------------------------------------------------------------------------------------------------------------------|---------------------------------|-----------------------|-------------------------------|---------------------|
| <i>Anti-T. cruzi</i>       | 1  | JGI8                                                                                                                                                                                 | 0.41                            | 0.78                  | 0.53                          | 0.78                |
|                            | 2  | MACCSFP72 • AM_Q_AB_nCi_2_MP8_P_KA_p_MAS                                                                                                                                             | 0.53                            | 0.70                  | 0.62                          | 0.70                |
|                            | 3  | frag75 • MACCSFP72 • N2_B_AB_nCi_2_MP0_D_KA_e-p_MAS                                                                                                                                  | 0.64                            | 0.61                  | 0.71                          | 0.61                |
|                            | 4  | PubchemFP605 • K_B_AB_nCi_2_SS2_C_KA_psa-r_MAS • K_B_AB_nCi_2_SSS2_P_KA_psa-c_MAS • N2_F_AB_nCi_2_MP6_C_KA_psa_MAS                                                                   | 0.69                            | 0.56                  | 0.73                          | 0.58                |
|                            | 5  | D288 • MACCSFP72 • MATS5v • K_B_AB_nCi_2_DS8_T_KA_e-c_MAS • K_Q_AB_nCi_2_DS3_C_KA_e_MAS                                                                                              | 0.72                            | 0.53                  | 0.71                          | 0.58                |
|                            | 6  | <b>frag16 • MACCSFP72 • K_Q_AB_nCi_2_SS10_T_KA_r_MAS • K_B_AB_nCi_2_DS7_C_KA_e-p_MAS • K_B_AB_nCi_2_DS2_X_KA_r-c_MAS • N2_F_AB_nCi_2_NS7_P_KA_m_MAS</b>                              | <b>0.76</b>                     | <b>0.50</b>           | <b>0.82</b>                   | <b>0.52</b>         |
|                            | 7  | KRFP4820 • MATS5v • K_B_AB_nCi_2_DS2_T_KA_psa-p_MAS • K_F_AB_nCi_2_DS3_T_KA_p_MAS • K_B_AB_nCi_2_NS14_A_KA_psa-c_MAS • K_B_AB_nCi_2_NS3_P_KA_psa-r_MAS • K_F_AB_nCi_2_NS5_M_KA_a_MAS | 0.80                            | 0.45                  | 0.76                          | 0.53                |
| <i>Anti-L. amazonensis</i> | 1  | KRFPC3710                                                                                                                                                                            | 0.52                            | 0.44                  | 0.79                          | 0.51                |
|                            | 2  | KRFP2 • SdssC                                                                                                                                                                        | 0.62                            | 0.39                  | 0.75                          | 0.40                |
|                            | 3  | KRFP2 • VE3_Dt • minHBint9                                                                                                                                                           | 0.72                            | 0.34                  | 0.87                          | 0.33                |
|                            | 4  | <b>KRFP2 • minHBint9 • IC3 • MDEC-23</b>                                                                                                                                             | <b>0.77</b>                     | <b>0.30</b>           | <b>0.84</b>                   | <b>0.31</b>         |
|                            | 5  | KRFP2 • D172 • VC-5 • VR1_Dt • minHBint9                                                                                                                                             | 0.83                            | 0.26                  | 0.92                          | 0.19                |
|                            | 6  | KRFP2 • PubchemFP206 • KRFPC3719 • AATSC2v • E3_Dt • SHBint8                                                                                                                         | 0.86                            | 0.24                  | 0.89                          | 0.26                |
|                            | 7  | KRFP2 • KRFP133 • KRFPC3440 • APC2D7_C_O • ATSC8v • minHBint9 • SD_B_AB_nCi_2_DS9_A_KA_psa-c_MAS                                                                                     | 0.89                            | 0.21                  | 0.90                          | 0.22                |
| <i>Anti-L. infatum</i>     | 1  | AM_B_AB_nCi_2_NS0_X_KA_a-p_MAS                                                                                                                                                       | 0.52                            | 0.44                  | 0.79                          | 0.51                |
|                            | 2  | AATSC3c • AM_B_AB_nCi_2_NS0_X_KA_a-p_MAS                                                                                                                                             | 0.62                            | 0.39                  | 0.75                          | 0.40                |
|                            | 3  | PubchemFP503 • MATS3c • AM_B_AB_nCi_2_NS0_X_KA_a-p_MAS                                                                                                                               | 0.72                            | 0.34                  | 0.87                          | 0.33                |
|                            | 4  | D470 • MATS3c • AM_F_AB_nCi_2_SS1_C_KA_psa_MAS • AM_Q_AB_nCi_2_NS13_X_KA_a_MAS                                                                                                       | 0.77                            | 0.30                  | 0.84                          | 0.31                |
|                            | 5  | D470 • MACCSFP159 • MATS3c • AM_B_AB_nCi_2_DS1_C_KA_psa-v_MAS • AM_Q_AB_nCi_2_NS13_X_KA_a_MAS                                                                                        | 0.83                            | 0.26                  | 0.92                          | 0.19                |
|                            | 6  | <b>MATS3c • nHBint7 • AM_F_AB_nCi_2_NS12_T_KA_a_MAS • AM_B_AB_nCi_2_NS2_C_KA_psa-v_MAS • AM_B_AB_nCi_2_SS1_C_KA_v-c_MAS • AM_Q_AB_nCi_2_NS15_X_KA_a_MAS</b>                          | <b>0.72</b>                     | <b>0.42</b>           | <b>0.71</b>                   | <b>0.42</b>         |
|                            | 7  | PubchemFP503 • APC2D10_C_Cl • AATSC3c • nHBint7 • AM_B_AB_nCi_2_SS4_C_KA_psa-v_MAS • AM_F_AB_nCi_2_SS1_C_KA_c_MAS • AM_Q_AB_nCi_2_NS13_X_KA_a_MAS                                    | 0.89                            | 0.21                  | 0.90                          | 0.22                |



**Table S2.** Toxicity QSAR models based on naphthoquinone derivatives obtained by the replacement method. Best model in bold.

| N° | Descriptors                                                                                                                                                                                      | R <sup>2</sup> <sub>train</sub> | RMSE <sub>train</sub> | R <sup>2</sup> <sub>val</sub> | RMSE <sub>val</sub> |
|----|--------------------------------------------------------------------------------------------------------------------------------------------------------------------------------------------------|---------------------------------|-----------------------|-------------------------------|---------------------|
| 1  | N2_B_AB_nCi_2_MP7_P_KA_psa-p_MAS                                                                                                                                                                 | 0.79                            | 0.29                  | 0.75                          | 0.35                |
| 2  | KRFPC3455 • K_B_AB_nCi_2_DS3_X_KA_a-e_MAS                                                                                                                                                        | 0.84                            | 0.26                  | 0.90                          | 0.26                |
| 3  | frag14 • K_B_AB_nCi_2_DS10_C_KA_psa-c_MAS •<br>K_B_AB_nCi_2_DS3_X_KA_a-e_MAS                                                                                                                     | 0.89                            | 0.22                  | 0.92                          | 0.21                |
| 4  | K_B_AB_nCi_2_DS1_X_KA_a-p_MAS • K_F_AB_nCi_2_SS2_P_KA_c_MAS •<br>N2_F_AB_nCi_2_MP4_P_KA_psa_MAS • K_Q_AB_nCi_2_NS4_A_KA_v_MAS<br>K_B_AB_nCi_2_NS3_T_KA_psa-r_MAS • K_B_AB_nCi_2_DS7_P_KA_c-p_MAS | 0.93                            | 0.17                  | 0.83                          | 0.27                |
| 5  | • N2_B_AB_nCi_2_MP4_P_KA_psa-p_MAS • K_B_AB_nCi_2_DS3_X_KA_a-e_MAS • K_Q_AB_nCi_2_SS14_C_KA_c_MAS                                                                                                | <b>0.93</b>                     | <b>0.16</b>           | <b>0.91</b>                   | <b>0.23</b>         |
| 6  | frag74 • K_B_AB_nCi_2_NS6_C_KA_r-c_MAS • N2_B_AB_nCi_2_NS4_C_KA_psa-c_MAS • K_B_AB_nCi_2_SS3_X_KA_psa-v_MAS • K_B_AB_nCi_2_DS1_X_KA_a-v_MAS • K_Q_AB_nCi_2_SS5_P_KA_c_MAS                        | 0.95                            | 0.15                  | 0.86                          | 0.24                |
| 7  | D470 • ASP-4 • K_B_AB_nCi_2_DS5_P_KA_c-p_MAS •<br>K_B_AB_nCi_2_DS3_X_KA_a-e_MAS • K_F_AB_nCi_2_NS13_D_KA_c_MAS •<br>K_F_AB_nCi_2_DS3_X_KA_a_MAS • K_Q_AB_nCi_2_NS0_A_KA_psa_MAS                  | 0.96                            | 0.13                  | 0.83                          | 0.27                |

**Table S3.** Intercorrelation matrix of the QSAR model descriptors for anti-Chagas activity.

| Descriptors           | <i>a</i> <sub>1</sub> | <i>a</i> <sub>2</sub> | <i>a</i> <sub>3</sub> | <i>a</i> <sub>4</sub> | <i>a</i> <sub>5</sub> | <i>a</i> <sub>6</sub> | 'VIF' |
|-----------------------|-----------------------|-----------------------|-----------------------|-----------------------|-----------------------|-----------------------|-------|
| <i>a</i> <sub>1</sub> | 1.000                 | 0.256                 | 0.080                 | 0.077                 | 0.024                 | 0.007                 | 1.096 |
| <i>a</i> <sub>2</sub> |                       | 1.000                 | 0.400                 | 0.180                 | 0.090                 | 0.009                 | 1.517 |
| <i>a</i> <sub>3</sub> |                       |                       | 1.000                 | 0.245                 | 0.000                 | 0.127                 | 1.353 |
| <i>a</i> <sub>4</sub> |                       |                       |                       | 1.000                 | 0.004                 | 0.199                 | 1.177 |
| <i>a</i> <sub>5</sub> |                       |                       |                       |                       | 1.000                 | 0.092                 | 1.049 |
| <i>a</i> <sub>6</sub> |                       |                       |                       |                       |                       | 1.000                 | 1.137 |

**Table S4.** Numerical values of the QSAR antichagas model descriptors.

| ID | <i>a</i> <sub>1</sub> | <i>a</i> <sub>2</sub> | <i>a</i> <sub>3</sub> | <i>a</i> <sub>4</sub> | <i>a</i> <sub>5</sub> | <i>a</i> <sub>6</sub> |
|----|-----------------------|-----------------------|-----------------------|-----------------------|-----------------------|-----------------------|
| 1  | 0                     | 0                     | 1.496                 | -0.007                | -0.676                | 13111.508             |
| 2  | 0                     | 0                     | -0.311                | -0.111                | -1.751                | 13835.308             |
| 3  | 0                     | 0                     | -0.277                | -0.001                | -1.489                | 13729.559             |
| 4  | 0                     | 0                     | -0.257                | 0.039                 | -1.063                | 13700.292             |
| 5  | 0                     | 0                     | -0.761                | -0.438                | -2.381                | 13861.989             |
| 6  | 0                     | 0                     | -0.796                | -0.290                | -1.908                | 13753.676             |
| 7  | 0                     | 0                     | -0.800                | -0.229                | -1.310                | 13723.545             |
| 8  | 0                     | 0                     | 0.756                 | 0.172                 | -1.207                | 13759.096             |
| 9  | 0                     | 0                     | 0.867                 | 0.161                 | -0.708                | 13662.295             |
| 10 | 0                     | 0                     | 0.910                 | 0.158                 | -0.194                | 13635.485             |
| 11 | 0                     | 0                     | 1.406                 | 0.187                 | -1.871                | 13936.721             |
| 12 | 0                     | 0                     | 1.522                 | 0.173                 | -1.494                | 13820.680             |
| 13 | 0                     | 0                     | 1.577                 | 0.169                 | -1.185                | 13788.173             |
| 14 | 0                     | 0                     | -0.453                | 0.508                 | -2.157                | 14446.252             |
| 15 | 0                     | 0                     | -0.375                | 0.502                 | -1.847                | 14275.599             |
| 16 | 0                     | 0                     | -0.328                | 0.503                 | -1.655                | 14228.385             |

|    |   |   |        |        |        |           |
|----|---|---|--------|--------|--------|-----------|
| 17 | 0 | 0 | -2.170 | 1.029  | -2.406 | 15688.225 |
| 18 | 0 | 0 | 0.537  | -0.362 | -0.414 | 13684.902 |
| 19 | 0 | 0 | 0.554  | -0.268 | -0.388 | 13596.148 |
| 20 | 0 | 0 | 0.573  | -0.228 | -0.380 | 13571.738 |
| 21 | 0 | 0 | -0.160 | -0.750 | -0.124 | 13786.813 |
| 22 | 0 | 0 | -0.177 | -0.616 | -0.083 | 13686.212 |
| 23 | 0 | 0 | -0.171 | -0.559 | -0.078 | 13658.503 |
| 24 | 0 | 0 | -0.617 | -1.153 | 0.173  | 13911.535 |
| 25 | 0 | 0 | -0.675 | -1.042 | 0.222  | 13796.826 |
| 26 | 0 | 0 | -0.684 | -0.992 | 0.226  | 13765.212 |
| 27 | 0 | 0 | 0.386  | 0.027  | 0.262  | 12938.598 |
| 28 | 0 | 0 | -0.824 | -0.134 | -1.203 | 13666.712 |
| 29 | 0 | 0 | -0.837 | -0.029 | -0.992 | 13561.939 |
| 30 | 0 | 0 | -0.834 | 0.011  | -0.615 | 13532.849 |
| 31 | 0 | 0 | -1.119 | -0.516 | -1.748 | 13693.570 |
| 32 | 0 | 0 | -1.190 | -0.383 | -1.348 | 13586.263 |
| 33 | 0 | 0 | -1.206 | -0.325 | -0.809 | 13556.318 |
| 34 | 0 | 0 | -0.051 | 0.210  | -0.502 | 13589.988 |
| 35 | 0 | 0 | 0.006  | 0.198  | -0.041 | 13494.075 |
| 36 | 0 | 0 | 0.031  | 0.195  | 0.447  | 13467.411 |
| 37 | 0 | 0 | 0.399  | 0.226  | -1.225 | 13768.792 |
| 38 | 0 | 0 | 0.430  | 0.210  | -0.912 | 13653.665 |
| 39 | 0 | 0 | 0.450  | 0.206  | -0.652 | 13621.316 |
| 40 | 0 | 0 | -1.106 | 0.552  | -1.604 | 14281.758 |
| 41 | 0 | 0 | -1.158 | 0.544  | -0.490 | 14854.082 |
| 42 | 0 | 0 | -1.122 | 0.546  | -0.485 | 14788.235 |
| 43 | 0 | 0 | -2.443 | 1.080  | -2.104 | 15533.840 |
| 44 | 0 | 0 | -0.754 | -0.657 | 0.917  | 13490.723 |
| 45 | 0 | 0 | -1.014 | -1.228 | 1.149  | 13743.456 |
| 46 | 0 | 0 | -1.095 | -1.149 | 1.237  | 13629.827 |
| 47 | 0 | 0 | -1.115 | -1.112 | 1.240  | 13598.431 |
| 48 | 0 | 0 | -0.227 | -0.385 | 0.516  | 13515.299 |
| 49 | 0 | 0 | -0.239 | -0.301 | 0.581  | 13427.421 |
| 50 | 0 | 0 | -0.234 | -0.264 | 0.593  | 13403.152 |
| 51 | 0 | 0 | -0.705 | -0.816 | 0.831  | 13617.895 |
| 52 | 0 | 0 | -0.748 | -0.705 | 0.912  | 13518.258 |
| 53 | 0 | 0 | -0.216 | 3.325  | -2.585 | 20485.618 |
| 54 | 1 | 0 | -0.134 | 3.533  | -2.015 | 20267.303 |
| 55 | 0 | 0 | -0.665 | 1.494  | -2.437 | 20512.441 |
| 56 | 1 | 0 | -0.648 | 1.627  | -1.595 | 20288.806 |
| 57 | 0 | 0 | 0.457  | 2.850  | -1.153 | 20319.540 |

|    |   |   |        |        |        |           |
|----|---|---|--------|--------|--------|-----------|
| 58 | 0 | 0 | 0.465  | 2.938  | -1.131 | 20139.368 |
| 59 | 0 | 0 | -0.127 | 1.110  | -0.972 | 20426.307 |
| 60 | 0 | 0 | -0.131 | 1.144  | -0.887 | 20221.951 |
| 61 | 0 | 0 | -0.547 | 0.097  | -0.744 | 20553.937 |
| 62 | 0 | 0 | -0.579 | 0.087  | -0.630 | 20321.568 |
| 63 | 0 | 0 | 1.230  | 0.132  | -1.352 | 13901.892 |
| 64 | 0 | 0 | 0.031  | 0.277  | -0.683 | 14422.467 |
| 65 | 0 | 0 | 0.005  | 0.264  | -0.948 | 14457.586 |
| 66 | 0 | 0 | -0.050 | 0.265  | -1.198 | 14584.850 |
| 67 | 0 | 0 | -0.688 | 0.416  | -1.389 | 15094.040 |
| 68 | 0 | 0 | -0.690 | 0.417  | -0.926 | 15158.033 |
| 69 | 2 | 1 | -1.337 | -1.666 | -0.286 | 10706.019 |
| 70 | 1 | 1 | -2.210 | -1.450 | -1.319 | 10837.766 |
| 71 | 1 | 1 | -2.210 | -1.811 | -0.557 | 9985.253  |
| 72 | 0 | 0 | 5.295  | 0.680  | -0.040 | 15172.831 |
| 73 | 0 | 0 | 0.560  | 0.585  | -0.525 | 15775.276 |
| 74 | 1 | 1 | -2.123 | -1.801 | -2.615 | 11065.610 |
| 75 | 1 | 1 | -1.482 | -1.523 | -2.558 | 15667.925 |
| 76 | 1 | 1 | -1.418 | -1.567 | -2.209 | 16199.941 |
| 77 | 1 | 1 | -1.467 | -1.538 | -2.508 | 15933.594 |
| 78 | 1 | 1 | -1.085 | -1.240 | -1.257 | 15337.065 |
| 79 | 1 | 1 | -1.338 | -1.235 | -0.796 | 15870.217 |
| 80 | 1 | 1 | -1.628 | -1.120 | -0.232 | 15932.004 |
| 81 | 1 | 1 | -1.854 | -1.163 | -1.607 | 17108.500 |
| 82 | 1 | 1 | -1.285 | -1.229 | -1.083 | 15801.566 |
| 83 | 1 | 1 | -1.251 | -1.402 | -0.200 | 15582.794 |
| 84 | 1 | 1 | -1.216 | -1.416 | -1.295 | 14542.430 |
| 85 | 1 | 1 | -1.928 | -1.222 | 0.102  | 15774.963 |
| 86 | 1 | 1 | -1.769 | -1.373 | -0.661 | 15476.202 |
| 87 | 1 | 1 | -1.588 | -1.499 | -0.885 | 11034.161 |
| 88 | 1 | 1 | -1.729 | -1.340 | -1.021 | 15081.080 |
| 89 | 1 | 1 | -1.761 | -1.364 | -0.649 | 15460.264 |
| 90 | 1 | 1 | -1.572 | -1.611 | -0.173 | 11035.114 |
| 91 | 1 | 1 | -1.239 | -1.539 | -0.665 | 11033.694 |
| 92 | 1 | 1 | -1.162 | -1.363 | 0.135  | 11036.211 |
| 93 | 1 | 1 | -2.009 | -1.631 | -0.134 | 11056.678 |
| 94 | 1 | 1 | -1.828 | -1.621 | -0.826 | 11132.035 |
| 95 | 1 | 1 | -1.174 | -1.287 | 2.537  | 15406.068 |
| 96 | 1 | 1 | -1.349 | -1.300 | 1.437  | 16555.827 |
| 97 | 1 | 1 | -1.328 | -1.300 | 3.314  | 15937.317 |
| 98 | 1 | 1 | -1.574 | -1.159 | 1.385  | 15998.861 |

|     |   |   |        |        |        |           |
|-----|---|---|--------|--------|--------|-----------|
| 99  | 2 | 1 | -1.328 | -1.593 | -1.832 | 15103.452 |
| 100 | 0 | 0 | 2.836  | -1.435 | -3.039 | 13343.651 |
| 101 | 0 | 0 | 0.673  | -1.176 | -2.095 | 16440.801 |
| 102 | 2 | 0 | 1.448  | -1.213 | -1.959 | 14200.882 |
| 103 | 2 | 0 | 0.196  | -0.981 | -1.417 | 17354.751 |
| 104 | 2 | 0 | 1.158  | -1.676 | -0.606 | 14363.506 |
| 105 | 2 | 0 | 1.126  | -1.524 | -2.038 | 14563.279 |
| 106 | 2 | 0 | 0.918  | -1.783 | -1.945 | 14734.934 |
| 107 | 2 | 0 | 1.061  | -1.624 | -1.454 | 14395.389 |
| 108 | 2 | 0 | 0.878  | -1.862 | -1.182 | 14557.470 |
| 109 | 0 | 0 | 1.442  | -1.550 | -1.408 | 14630.723 |
| 110 | 0 | 1 | 0.628  | -1.569 | -2.776 | 15817.688 |
| 111 | 0 | 0 | 2.250  | -1.785 | -2.989 | 14185.373 |
| 112 | 0 | 0 | 1.769  | -1.215 | -1.270 | 14161.017 |
| 113 | 0 | 0 | 0.889  | -1.183 | -1.502 | 15416.855 |
| 114 | 0 | 0 | 2.519  | -1.122 | -2.479 | 14058.657 |
| 115 | 0 | 0 | 2.356  | -0.933 | -1.718 | 14824.455 |
| 116 | 0 | 0 | 2.745  | -0.960 | -2.058 | 14082.609 |
| 117 | 0 | 0 | 3.539  | -1.340 | -0.555 | 11369.578 |
| 118 | 0 | 0 | 2.226  | -0.426 | 0.455  | 17529.511 |
| 119 | 0 | 0 | -1.293 | -1.502 | -3.668 | 12199.662 |
| 120 | 0 | 0 | 3.830  | -1.344 | 1.362  | 14739.716 |
| 121 | 0 | 0 | 1.244  | -1.362 | 1.305  | 18265.655 |
| 122 | 1 | 1 | -0.552 | -1.466 | -1.541 | 13016.675 |
| 123 | 1 | 1 | -0.579 | -1.376 | -2.060 | 13694.258 |
| 124 | 1 | 1 | -0.887 | -1.482 | -1.176 | 13478.120 |
| 125 | 1 | 1 | -1.266 | -1.341 | -1.736 | 13606.876 |
| 126 | 1 | 1 | -0.746 | -1.367 | -1.607 | 13541.772 |
| 127 | 1 | 1 | -1.475 | -1.348 | -3.166 | 13630.209 |
| 128 | 1 | 1 | -0.924 | -1.659 | -0.872 | 13189.645 |
| 129 | 1 | 1 | -1.122 | -1.595 | -0.806 | 14090.598 |
| 130 | 2 | 1 | 0.186  | -0.904 | 0.545  | 15680.558 |
| 131 | 1 | 1 | -1.191 | -1.795 | -2.590 | 10924.157 |
| 132 | 1 | 1 | -1.236 | -1.725 | -2.104 | 10923.306 |
| 133 | 1 | 1 | -1.535 | -1.583 | -2.508 | 10917.311 |
| 134 | 1 | 1 | -1.338 | -1.246 | -3.444 | 10918.804 |
| 135 | 1 | 1 | -1.375 | -1.332 | -0.648 | 10918.804 |
| 136 | 0 | 1 | -1.605 | -1.744 | -4.112 | 9628.535  |
| 137 | 0 | 0 | 1.714  | -1.370 | -4.420 | 10616.460 |
| 138 | 1 | 1 | -1.832 | -1.702 | -1.253 | 10694.968 |
| 139 | 1 | 1 | -1.793 | -1.729 | 1.290  | 10704.129 |

|     |   |   |        |        |        |           |
|-----|---|---|--------|--------|--------|-----------|
| 140 | 1 | 1 | -1.850 | -1.765 | -1.108 | 10696.301 |
| 141 | 1 | 1 | -1.571 | -1.504 | 0.497  | 10704.128 |
| 142 | 0 | 0 | -1.078 | -0.798 | -2.488 | 10614.837 |
| 143 | 0 | 0 | 5.295  | 0.680  | -0.040 | 15172.831 |
| 144 | 0 | 0 | 0.560  | 0.585  | -0.525 | 15775.276 |
| 145 | 0 | 0 | 3.433  | 0.920  | 0.060  | 16341.484 |
| 146 | 0 | 0 | -0.412 | 1.419  | -1.550 | 16286.350 |
| 147 | 0 | 0 | 3.087  | 0.295  | 0.245  | 15643.198 |
| 148 | 0 | 0 | -1.306 | -0.461 | -2.751 | 11247.069 |
| 149 | 0 | 0 | -1.896 | -1.433 | -1.484 | 11361.414 |
| 150 | 0 | 0 | -1.900 | -0.796 | -2.378 | 11540.710 |
| 151 | 0 | 0 | -0.977 | -0.673 | -2.363 | 10995.990 |
| 152 | 0 | 0 | 4.896  | 0.774  | -0.722 | 15497.619 |
| 153 | 0 | 1 | -1.711 | -1.168 | -2.643 | 14895.553 |
| 154 | 0 | 1 | -1.603 | -1.166 | 0.327  | 15554.030 |
| 155 | 0 | 1 | -2.250 | -1.086 | -2.702 | 15498.627 |
| 156 | 0 | 1 | -1.871 | -1.067 | -0.085 | 14961.358 |
| 157 | 0 | 1 | -1.671 | -1.182 | -2.905 | 14822.476 |
| 158 | 0 | 1 | -1.085 | -2.009 | 0.285  | 10067.953 |
| 159 | 1 | 1 | -1.788 | -1.717 | -1.809 | 11666.624 |
| 160 | 1 | 1 | -1.774 | -1.571 | -1.923 | 11564.100 |
| 161 | 1 | 1 | -1.085 | -1.240 | -1.257 | 15337.065 |
| 162 | 1 | 1 | -1.585 | -1.752 | -2.040 | 11710.334 |
| 163 | 1 | 1 | -1.604 | -1.476 | -0.226 | 11586.318 |
| 164 | 1 | 1 | -1.725 | -1.828 | -1.079 | 11015.382 |
| 165 | 1 | 1 | -1.471 | -1.561 | 0.188  | 14047.617 |
| 166 | 1 | 1 | -1.269 | -1.497 | -0.434 | 13688.571 |
| 167 | 1 | 1 | -1.229 | -1.494 | 0.510  | 14125.127 |
| 168 | 1 | 1 | -1.849 | -1.344 | -1.350 | 14141.500 |
| 169 | 1 | 1 | -1.289 | -1.497 | -0.078 | 13660.717 |
| 170 | 1 | 1 | -1.247 | -1.495 | 0.720  | 14083.651 |
| 171 | 1 | 1 | -1.857 | -1.347 | -1.217 | 14101.207 |
| 172 | 1 | 1 | -1.611 | -1.444 | 0.562  | 13575.192 |
| 173 | 1 | 1 | -1.341 | -1.500 | 1.058  | 13510.718 |
| 174 | 1 | 1 | -1.566 | -1.496 | 0.845  | 12774.773 |
| 175 | 0 | 0 | 1.551  | -1.669 | -3.294 | 10249.534 |
| 176 | 0 | 0 | 0.001  | -1.960 | -0.558 | 10426.094 |
| 177 | 1 | 1 | -0.153 | -1.383 | -2.847 | 10458.401 |
| 178 | 1 | 1 | -1.553 | -1.267 | -5.268 | 10533.181 |
| 179 | 0 | 0 | 1.268  | -1.358 | -3.523 | 10980.540 |
| 180 | 0 | 0 | 1.404  | -1.165 | -3.005 | 11000.013 |



|     |   |   |        |        |        |           |
|-----|---|---|--------|--------|--------|-----------|
| 181 | 0 | 0 | -0.295 | -1.424 | -3.171 | 11310.044 |
| 182 | 0 | 0 | -1.437 | -1.534 | -5.069 | 11728.993 |
| 183 | 0 | 0 | -1.030 | -1.670 | -3.440 | 11481.003 |
| 184 | 0 | 0 | -0.126 | -1.131 | -2.126 | 12033.028 |
| 185 | 0 | 0 | -1.437 | -1.151 | -3.979 | 12446.730 |
| 186 | 0 | 0 | -0.906 | -1.340 | -2.824 | 12202.023 |
| 187 | 0 | 0 | -0.161 | -1.135 | -2.160 | 12043.199 |
| 188 | 0 | 0 | -1.444 | -1.190 | -3.943 | 12459.355 |
| 189 | 0 | 0 | -0.933 | -1.349 | -2.754 | 12213.320 |
| 190 | 0 | 0 | -0.922 | -1.817 | -1.026 | 11483.303 |
| 191 | 3 | 1 | -1.851 | -1.714 | -2.089 | 11954.476 |
| 192 | 3 | 1 | -1.960 | -1.766 | -0.125 | 11814.965 |
| 193 | 3 | 1 | -0.910 | -1.259 | -1.113 | 14950.935 |
| 194 | 3 | 1 | -0.897 | -1.289 | -0.690 | 14787.511 |
| 195 | 3 | 1 | -0.904 | -1.258 | -2.242 | 14546.030 |
| 196 | 3 | 1 | -1.144 | -1.386 | -2.334 | 14342.728 |
| 197 | 3 | 1 | -1.197 | -1.407 | -0.561 | 14173.887 |
| 198 | 3 | 1 | -1.448 | -1.235 | -1.585 | 14463.791 |
| 199 | 3 | 1 | -0.917 | -1.355 | -2.625 | 13909.987 |
| 200 | 3 | 1 | -0.965 | -1.380 | -0.816 | 13736.730 |
| 201 | 3 | 1 | -1.166 | -1.569 | -1.981 | 14073.395 |
| 202 | 1 | 1 | -1.412 | -1.423 | 0.441  | 13878.897 |
| 203 | 1 | 1 | 2.508  | -1.418 | 0.071  | 14357.454 |
| 204 | 1 | 1 | -1.587 | -1.428 | 1.706  | 13299.283 |
| 205 | 1 | 1 | -1.391 | -1.416 | 0.202  | 13920.235 |
| 206 | 1 | 1 | -1.503 | -1.420 | -0.275 | 13478.794 |
| 207 | 1 | 1 | -1.581 | -1.426 | 0.930  | 13322.109 |
| 208 | 1 | 1 | -0.928 | -1.293 | -0.013 | 16516.650 |
| 209 | 1 | 1 | -1.180 | -1.209 | -0.132 | 16624.801 |
| 210 | 2 | 1 | -1.309 | -1.946 | -1.200 | 10699.968 |
| 211 | 1 | 1 | -1.067 | -1.761 | 1.966  | 10974.098 |
| 212 | 1 | 1 | -1.546 | -1.866 | -1.893 | 11391.144 |
| 213 | 1 | 1 | -1.503 | -1.826 | -2.421 | 11457.450 |
| 214 | 1 | 1 | -1.758 | -1.677 | -3.289 | 11396.658 |
| 215 | 1 | 1 | -1.499 | -1.913 | -1.727 | 11618.522 |
| 216 | 1 | 1 | -1.531 | -1.699 | -1.846 | 11329.871 |
| 217 | 0 | 1 | -1.226 | -1.767 | 3.056  | 13595.912 |
| 218 | 1 | 1 | 3.308  | -1.173 | 1.527  | 17325.021 |
| 219 | 2 | 1 | -1.512 | -1.700 | -1.098 | 10744.198 |
| 220 | 1 | 1 | -1.374 | -1.948 | -2.318 | 10507.910 |
| 221 | 2 | 1 | -1.309 | -1.946 | -1.200 | 10699.968 |

**Table S5.** Experimental and predicted values of antichagas activity. Residuals and influence values  $h$  ( $h^{\text{lim}} = 0.196$ ) are reported. ^ validation group and \* test group.

| ID  | Experimental activity | Predicted activity | Residuals | $h$   |
|-----|-----------------------|--------------------|-----------|-------|
| 69  | 2.614                 | 2.913              | -0.300    | 0.034 |
| 70  | 2.503                 | 2.618              | -0.116    | 0.019 |
| 71  | 2.254                 | 2.582              | -0.328    | 0.026 |
| 72  | 1.037                 | 1.819              | -0.781    | 0.183 |
| 73^ | 1.661                 | 2.000              | -0.339    | 0.113 |
| 74^ | 1.701                 | 1.986              | -0.285    | 0.028 |
| 75  | 1.907                 | 1.347              | 0.561     | 0.024 |
| 76^ | 0.833                 | 1.268              | -0.436    | 0.021 |
| 77  | 0.914                 | 1.292              | -0.378    | 0.023 |
| 78  | 1.238                 | 1.887              | -0.649    | 0.020 |
| 79  | 1.318                 | 1.907              | -0.589    | 0.023 |
| 80* | 2.555                 | 2.143              | 0.413     | 0.032 |
| 81  | 1.338                 | 1.642              | -0.304    | 0.037 |
| 82^ | 1.598                 | 1.865              | -0.268    | 0.022 |
| 83  | 1.396                 | 1.909              | -0.512    | 0.022 |
| 84  | 1.641                 | 1.872              | -0.231    | 0.016 |
| 85  | 1.775                 | 2.170              | -0.395    | 0.036 |
| 86  | 2.454                 | 1.919              | 0.535     | 0.023 |
| 87  | 2.721                 | 2.557              | 0.164     | 0.015 |
| 88* | 1.745                 | 1.950              | -0.205    | 0.021 |
| 89^ | 2.194                 | 1.932              | 0.262     | 0.023 |
| 90  | 2.429                 | 2.587              | -0.159    | 0.020 |
| 91  | 1.674                 | 2.526              | -0.852    | 0.017 |
| 92  | 2.747                 | 2.839              | -0.092    | 0.019 |
| 93  | 2.395                 | 2.615              | -0.220    | 0.022 |
| 94  | 1.369                 | 2.459              | -1.090    | 0.017 |
| 95* | 2.496                 | 2.570              | -0.074    | 0.073 |
| 96^ | 2.643                 | 2.152              | 0.491     | 0.052 |
| 97  | 2.342                 | 2.625              | -0.283    | 0.105 |
| 98  | 2.026                 | 2.400              | -0.374    | 0.052 |
| 99  | 2.368                 | 1.873              | 0.495     | 0.028 |
| 100 | -0.229                | -0.173             | -0.056    | 0.086 |
| 101 | -0.658                | -0.100             | -0.558    | 0.043 |
| 102 | 1.623                 | 0.954              | 0.669     | 0.085 |
| 103 | 1.394                 | 0.822              | 0.572     | 0.103 |
| 104 | -0.004                | 0.777              | -0.781    | 0.110 |
| 105 | 0.549                 | 0.611              | -0.062    | 0.091 |

|      |        |        |        |       |
|------|--------|--------|--------|-------|
| 106  | 0.879  | 0.373  | 0.506  | 0.101 |
| 107^ | 0.130  | 0.666  | -0.536 | 0.097 |
| 108* | 0.609  | 0.483  | 0.126  | 0.112 |
| 109* | 0.068  | -0.064 | 0.132  | 0.055 |
| 110  | 0.210  | 0.658  | -0.449 | 0.080 |
| 111  | -0.310 | -0.590 | 0.280  | 0.084 |
| 112^ | -0.252 | 0.333  | -0.584 | 0.045 |
| 113  | 0.207  | 0.175  | 0.031  | 0.040 |
| 114  | 0.140  | 0.131  | 0.009  | 0.059 |
| 115  | 0.352  | 0.331  | 0.021  | 0.048 |
| 116  | 0.861  | 0.337  | 0.524  | 0.059 |
| 117^ | 0.253  | 0.689  | -0.436 | 0.114 |
| 118  | 0.093  | 0.743  | -0.650 | 0.074 |
| 119  | 0.780  | 0.268  | 0.512  | 0.065 |
| 120^ | -0.721 | 0.405  | -1.126 | 0.155 |
| 121  | 0.342  | -0.014 | 0.356  | 0.115 |
| 122  | 1.748  | 1.992  | -0.244 | 0.021 |
| 123  | 1.305  | 1.855  | -0.550 | 0.024 |
| 124  | 1.711  | 1.996  | -0.286 | 0.016 |
| 125* | 2.084  | 2.036  | 0.048  | 0.018 |
| 126  | 1.989  | 1.995  | -0.006 | 0.019 |
| 127  | 2.121  | 1.770  | 0.351  | 0.036 |
| 128^ | 2.090  | 1.945  | 0.145  | 0.018 |
| 129* | 2.837  | 1.872  | 0.966  | 0.016 |
| 130  | 2.929  | 2.724  | 0.205  | 0.051 |
| 131  | 1.797  | 1.929  | -0.132 | 0.031 |
| 132* | 2.207  | 2.094  | 0.113  | 0.025 |
| 133^ | 1.549  | 2.181  | -0.632 | 0.026 |
| 134  | 2.520  | 2.299  | 0.221  | 0.048 |
| 135  | 2.945  | 2.760  | 0.184  | 0.015 |
| 136  | 2.593  | 1.600  | 0.993  | 0.084 |
| 137  | 1.090  | 0.238  | 0.852  | 0.078 |
| 138  | 2.558  | 2.382  | 0.176  | 0.019 |
| 139* | 2.598  | 2.841  | -0.243 | 0.045 |
| 140  | 2.568  | 2.351  | 0.217  | 0.020 |
| 141  | 2.313  | 2.878  | -0.565 | 0.024 |
| 142  | 1.619  | 1.431  | 0.188  | 0.042 |
| 143^ | 1.037  | 1.819  | -0.781 | 0.183 |
| 144  | 1.661  | 2.000  | -0.339 | 0.113 |
| 145  | 2.692  | 2.036  | 0.656  | 0.143 |
| 146  | 3.302  | 2.593  | 0.710  | 0.264 |

|      |        |       |        |       |
|------|--------|-------|--------|-------|
| 147* | 2.053  | 1.645 | 0.409  | 0.090 |
| 148  | 1.248  | 1.604 | -0.356 | 0.063 |
| 149  | 1.904  | 0.969 | 0.935  | 0.077 |
| 150  | 1.830  | 1.365 | 0.465  | 0.073 |
| 151  | 1.714  | 1.492 | 0.222  | 0.043 |
| 152  | 1.623  | 1.756 | -0.133 | 0.175 |
| 153  | 1.318  | 1.468 | -0.150 | 0.060 |
| 154^ | 2.006  | 1.910 | 0.096  | 0.059 |
| 155  | 1.338  | 1.476 | -0.138 | 0.073 |
| 156  | 2.555  | 2.061 | 0.495  | 0.057 |
| 157* | 1.598  | 1.413 | 0.184  | 0.062 |
| 158  | 3.107  | 2.065 | 1.043  | 0.070 |
| 159  | 2.182  | 2.076 | 0.105  | 0.019 |
| 160  | 2.542  | 2.210 | 0.332  | 0.019 |
| 161* | 1.238  | 1.887 | -0.649 | 0.020 |
| 162  | 1.762  | 1.970 | -0.208 | 0.021 |
| 163  | 2.409  | 2.605 | -0.196 | 0.017 |
| 164  | 2.327  | 2.226 | 0.101  | 0.021 |
| 165  | 3.245  | 2.138 | 1.106  | 0.024 |
| 166  | 2.522  | 2.125 | 0.397  | 0.017 |
| 167  | 2.149  | 2.225 | -0.076 | 0.026 |
| 168  | 1.936  | 2.068 | -0.132 | 0.020 |
| 169* | 2.585  | 2.200 | 0.384  | 0.019 |
| 170* | 2.979  | 2.274 | 0.705  | 0.030 |
| 171^ | 2.933  | 2.098 | 0.835  | 0.020 |
| 172  | 1.945  | 2.422 | -0.477 | 0.028 |
| 173* | 3.401  | 2.450 | 0.951  | 0.035 |
| 174* | 2.534  | 2.570 | -0.036 | 0.031 |
| 175  | -0.102 | 0.257 | -0.359 | 0.071 |
| 176  | 0.781  | 0.632 | 0.149  | 0.083 |
| 177  | 2.751  | 2.250 | 0.501  | 0.053 |
| 178  | 1.799  | 2.019 | -0.220 | 0.104 |
| 179  | 0.137  | 0.400 | -0.263 | 0.050 |
| 180  | 0.336  | 0.664 | -0.328 | 0.040 |
| 181^ | 0.814  | 0.501 | 0.313  | 0.041 |
| 182  | -0.796 | 0.069 | -0.865 | 0.088 |
| 183  | 0.009  | 0.259 | -0.250 | 0.060 |
| 184  | 0.332  | 0.829 | -0.496 | 0.030 |
| 185^ | 0.386  | 0.508 | -0.123 | 0.071 |
| 186* | 0.097  | 0.544 | -0.447 | 0.048 |
| 187* | 0.401  | 0.820 | -0.419 | 0.031 |

|      |        |       |        |       |
|------|--------|-------|--------|-------|
| 188  | -0.071 | 0.476 | -0.547 | 0.071 |
| 189  | 0.149  | 0.550 | -0.401 | 0.048 |
| 190  | 0.140  | 0.575 | -0.435 | 0.075 |
| 191* | 3.335  | 2.706 | 0.629  | 0.083 |
| 192  | 3.231  | 3.073 | 0.158  | 0.086 |
| 193  | 2.340  | 2.678 | -0.338 | 0.079 |
| 194  | 3.569  | 2.760 | 0.810  | 0.078 |
| 195  | 1.430  | 2.535 | -1.105 | 0.088 |
| 196  | 1.371  | 2.457 | -1.086 | 0.085 |
| 197^ | 3.448  | 2.816 | 0.632  | 0.077 |
| 198  | 3.521  | 2.752 | 0.768  | 0.084 |
| 199  | 3.225  | 2.488 | 0.737  | 0.091 |
| 200* | 3.260  | 2.850 | 0.410  | 0.077 |
| 201* | 2.916  | 2.405 | 0.511  | 0.078 |
| 202  | 2.960  | 2.343 | 0.617  | 0.025 |
| 203* | 2.573  | 1.794 | 0.779  | 0.119 |
| 204  | 3.168  | 2.706 | 0.462  | 0.048 |
| 205^ | 3.039  | 2.293 | 0.746  | 0.022 |
| 206* | 2.644  | 2.290 | 0.354  | 0.018 |
| 207^ | 1.951  | 2.554 | -0.603 | 0.033 |
| 208  | 2.896  | 1.843 | 1.053  | 0.026 |
| 209^ | 2.362  | 1.904 | 0.458  | 0.028 |
| 210  | 2.547  | 2.472 | 0.075  | 0.039 |
| 211  | 2.600  | 2.818 | -0.218 | 0.062 |
| 212  | 2.329  | 1.946 | 0.383  | 0.023 |
| 213  | 1.952  | 1.866 | 0.086  | 0.026 |
| 214  | 1.723  | 1.875 | -0.152 | 0.036 |
| 215^ | 1.743  | 1.887 | -0.144 | 0.023 |
| 216  | 1.938  | 2.123 | -0.185 | 0.020 |
| 217  | 2.052  | 2.192 | -0.140 | 0.127 |
| 218  | 2.097  | 1.680 | 0.417  | 0.163 |
| 219  | 2.217  | 2.736 | -0.519 | 0.031 |
| 220  | 2.624  | 1.932 | 0.692  | 0.032 |
| 221^ | 2.519  | 2.472 | 0.048  | 0.039 |

**Table S6.** Values predicted by the QSAR model of anti-Chagas activity of the 68 naphthoquinone derivatives (prediction group).

| ID | Predicted activity | $h^* = 0.196$ |
|----|--------------------|---------------|
| 1  | 1.808              | 0.041         |
| 2  | 1.551              | 0.064         |
| 3  | 1.721              | 0.068         |
| 4  | 1.844              | 0.069         |
| 5  | 1.161              | 0.063         |
| 6  | 1.415              | 0.068         |
| 7  | 1.594              | 0.070         |
| 8  | 1.830              | 0.059         |
| 9  | 1.922              | 0.055         |
| 10 | 2.020              | 0.056         |
| 11 | 1.618              | 0.061         |
| 12 | 1.687              | 0.056         |
| 13 | 1.743              | 0.054         |
| 14 | 1.959              | 0.126         |
| 15 | 2.036              | 0.118         |
| 16 | 2.078              | 0.115         |
| 17 | 2.346              | 0.299         |
| 18 | 1.515              | 0.040         |
| 19 | 1.623              | 0.042         |
| 20 | 1.664              | 0.043         |
| 21 | 1.255              | 0.051         |
| 22 | 1.409              | 0.052         |
| 23 | 1.469              | 0.052         |
| 24 | 0.955              | 0.072         |
| 25 | 1.096              | 0.072         |
| 26 | 1.150              | 0.071         |
| 27 | 2.164              | 0.055         |
| 28 | 1.717              | 0.076         |
| 29 | 1.878              | 0.081         |
| 30 | 1.993              | 0.085         |
| 31 | 1.276              | 0.068         |
| 32 | 1.506              | 0.076         |
| 33 | 1.672              | 0.081         |
| 34 | 2.113              | 0.074         |
| 35 | 2.203              | 0.074         |
| 36 | 2.297              | 0.078         |
| 37 | 1.911              | 0.067         |

|    |       |       |
|----|-------|-------|
| 38 | 1.975 | 0.064 |
| 39 | 2.025 | 0.064 |
| 40 | 2.203 | 0.149 |
| 41 | 2.309 | 0.157 |
| 42 | 2.321 | 0.155 |
| 43 | 2.508 | 0.319 |
| 44 | 1.658 | 0.084 |
| 45 | 1.143 | 0.109 |
| 46 | 1.264 | 0.111 |
| 47 | 1.306 | 0.111 |
| 48 | 1.78  | 0.064 |
| 49 | 1.889 | 0.067 |
| 50 | 1.93  | 0.067 |
| 51 | 1.463 | 0.082 |
| 52 | 1.605 | 0.084 |
| 53 | 3.399 | 0.810 |
| 54 | 4.101 | 0.871 |
| 55 | 1.739 | 0.375 |
| 56 | 2.430 | 0.400 |
| 57 | 3.189 | 0.598 |
| 58 | 3.309 | 0.616 |
| 59 | 1.621 | 0.268 |
| 60 | 1.707 | 0.270 |
| 61 | 0.727 | 0.169 |
| 62 | 0.785 | 0.167 |
| 63 | 1.690 | 0.054 |
| 64 | 1.981 | 0.085 |
| 65 | 1.913 | 0.085 |
| 66 | 1.848 | 0.088 |
| 67 | 1.924 | 0.127 |
| 68 | 2.003 | 0.128 |

**Table S7.** Intercorrelation matrix of the QSAR model descriptors for antileishmanial activity.

| QSAR model for anti- <i>L. amazonensis</i> |       |         |          |       |       |       |      |
|--------------------------------------------|-------|---------|----------|-------|-------|-------|------|
| Descriptor                                 | $b_1$ | $b_2$   | $b_3$    | $b_4$ | VIF   |       |      |
| $b_1$                                      | 1     | 0.00277 | 0.02     | 0.14  | 1.04  |       |      |
| $b_2$                                      |       | 1       | 0.000131 | 0.14  | 1.05  |       |      |
| $b_3$                                      |       |         | 1        | 0.19  | 1.05  |       |      |
| $b_4$                                      |       |         |          | 1     | 1.25  |       |      |
| QSAR model for anti- <i>L. infantum</i>    |       |         |          |       |       |       |      |
| Descriptor                                 | $c_1$ | $c_2$   | $c_3$    | $c_4$ | $c_5$ | $c_6$ | VIF  |
| $c_1$                                      | 1     | 0.01    | 0.02     | 0.03  | 0.03  | 0.01  | 1.00 |
| $c_2$                                      |       | 1       | 0.03     | 0.04  | 0.09  | 0.03  | 1.03 |
| $c_3$                                      |       |         | 1        | 0.27  | 0.21  | 0.15  | 1.45 |
| $c_4$                                      |       |         |          | 1     | 0.79  | 0.05  | 3.34 |
| $c_5$                                      |       |         |          |       | 1     | 0.04  | 2.87 |
| $c_6$                                      |       |         |          |       |       | 1     | 1.25 |

**Table S8.** Numerical values of the QSAR anti-*L. amazonensis* model descriptors.

| ID | $b_1$ | $b_2$ | $b_3$ | $b_4$ |
|----|-------|-------|-------|-------|
| 1  | 0     | 0     | 4.12  | 16.79 |
| 2  | 0     | 0     | 4.54  | 17.05 |
| 3  | 0     | 0     | 4.63  | 17.61 |
| 4  | 0     | 0     | 4.48  | 17.99 |
| 5  | 0     | 0     | 4.65  | 18.55 |
| 6  | 0     | 0     | 4.74  | 18.8  |
| 7  | 0     | 0     | 4.59  | 18.9  |
| 8  | 0     | 0     | 4.37  | 17.05 |
| 9  | 0     | 0     | 4.48  | 17.61 |
| 10 | 0     | 0     | 4.37  | 17.99 |
| 11 | 0     | 0     | 4.37  | 17.05 |
| 12 | 0     | 0     | 4.48  | 17.61 |
| 13 | 0     | 0     | 4.37  | 17.99 |
| 14 | 0     | 0     | 4.44  | 17.05 |
| 15 | 0     | 0     | 4.6   | 17.61 |
| 16 | 0     | 0     | 4.38  | 17.99 |
| 17 | 0     | 0     | 4.68  | 17.37 |
| 18 | 0     | 0     | 4.42  | 17.05 |
| 19 | 0     | 0     | 4.57  | 17.61 |
| 20 | 0     | 0     | 4.35  | 17.99 |
| 21 | 0     | 0     | 4.54  | 19.11 |
| 22 | 0     | 0     | 4.68  | 19.29 |
| 23 | 0     | 0     | 4.54  | 19.34 |



|    |   |      |      |       |
|----|---|------|------|-------|
| 24 | 0 | 0    | 4.43 | 18.65 |
| 25 | 0 | 0    | 4.56 | 19.19 |
| 26 | 0 | 0    | 4.43 | 19.52 |
| 27 | 0 | 0    | 4.07 | 16.79 |
| 28 | 0 | 0    | 4.48 | 17.05 |
| 29 | 0 | 0    | 4.57 | 17.61 |
| 30 | 0 | 0    | 4.43 | 17.99 |
| 31 | 0 | 0    | 4.6  | 18.55 |
| 32 | 0 | 0    | 4.68 | 18.8  |
| 33 | 0 | 0    | 4.55 | 18.9  |
| 34 | 0 | 0    | 4.31 | 17.05 |
| 35 | 0 | 0    | 4.41 | 17.61 |
| 36 | 0 | 0    | 4.31 | 17.99 |
| 37 | 0 | 0    | 4.31 | 17.05 |
| 38 | 0 | 0    | 4.41 | 17.61 |
| 39 | 0 | 0    | 4.31 | 17.99 |
| 40 | 0 | 0    | 4.38 | 17.05 |
| 41 | 0 | 0    | 4.54 | 17.61 |
| 42 | 0 | 6.02 | 4.32 | 17.99 |
| 43 | 0 | 6.36 | 4.61 | 17.37 |
| 44 | 0 | 0    | 4.49 | 19.34 |
| 45 | 0 | 0    | 4.39 | 18.65 |
| 46 | 0 | 0    | 4.52 | 19.19 |
| 47 | 0 | 0    | 4.39 | 19.52 |
| 48 | 0 | 0    | 4.36 | 17.05 |
| 49 | 0 | 0    | 4.51 | 17.61 |
| 50 | 0 | 0    | 4.31 | 17.99 |
| 51 | 0 | 0    | 4.49 | 19.11 |
| 52 | 0 | 0    | 4.63 | 19.29 |
| 53 | 0 | 0    | 4.27 | 17.21 |
| 54 | 0 | 0    | 4.29 | 18.03 |
| 55 | 0 | 0    | 4.4  | 18.96 |
| 56 | 0 | 0    | 4.42 | 19.36 |
| 57 | 0 | 0    | 4.13 | 17.21 |
| 58 | 0 | 0    | 4.22 | 18.03 |
| 59 | 0 | 0    | 4.34 | 19.6  |
| 60 | 0 | 0    | 4.36 | 19.93 |
| 61 | 0 | 0    | 4.23 | 18.48 |
| 62 | 0 | 0    | 4.25 | 19.33 |
| 63 | 0 | 0    | 4.63 | 18.37 |
| 64 | 0 | 5.15 | 4.82 | 19.85 |

|     |   |      |      |       |
|-----|---|------|------|-------|
| 65  | 0 | 0    | 4.91 | 19.65 |
| 66  | 0 | 0    | 4.82 | 19.33 |
| 67  | 0 | 5.32 | 4.93 | 20.04 |
| 68  | 0 | 5.36 | 4.98 | 20.02 |
| 222 | 0 | 0    | 4.26 | 21.34 |
| 223 | 0 | 0    | 4.37 | 18.94 |
| 224 | 0 | 0    | 4.19 | 15.2  |
| 225 | 0 | 0    | 4.15 | 15.2  |
| 69  | 0 | 0    | 4.14 | 14.32 |
| 226 | 0 | 0    | 4.93 | 20.93 |
| 227 | 0 | 0    | 4.96 | 19.47 |
| 228 | 0 | 0    | 5    | 20.76 |
| 229 | 0 | 0    | 3.79 | 4.75  |
| 230 | 0 | 0    | 3.69 | 4.75  |
| 231 | 0 | 0    | 3.75 | 6.45  |
| 232 | 0 | 0    | 4.21 | 9.82  |
| 233 | 0 | 0    | 4.16 | 12.3  |
| 234 | 1 | 0    | 4.61 | 26.8  |
| 235 | 1 | 0    | 4.67 | 23.65 |
| 236 | 1 | 0    | 4.84 | 23.5  |
| 237 | 1 | 0    | 4.88 | 24.57 |
| 238 | 1 | 0    | 4.95 | 27.33 |
| 239 | 1 | 0    | 4.95 | 26.92 |
| 240 | 1 | 0    | 4.67 | 23.69 |
| 241 | 0 | 0    | 5.01 | 26.03 |
| 242 | 0 | 0    | 5.16 | 25.39 |
| 243 | 0 | 0    | 5.16 | 25.52 |
| 244 | 0 | 0    | 5.05 | 24.26 |
| 245 | 0 | 0    | 5.18 | 21.58 |
| 246 | 0 | 0    | 5.12 | 23.06 |
| 247 | 0 | 0    | 3.17 | 11.11 |
| 248 | 0 | 0    | 1.92 | 5.66  |
| 249 | 0 | 0    | 3.83 | 11.11 |
| 250 | 0 | 0    | 3.32 | 10.48 |
| 251 | 0 | 0    | 3.97 | 9.35  |
| 252 | 0 | 0    | 4.57 | 10.14 |
| 253 | 0 | 0    | 4.47 | 15.81 |
| 254 | 0 | 0    | 4.79 | 14.18 |
| 255 | 0 | 0    | 4.77 | 14.18 |
| 256 | 0 | 0    | 4.98 | 15.66 |
| 257 | 0 | 0    | 4.98 | 15.66 |

|     |   |      |      |       |
|-----|---|------|------|-------|
| 258 | 0 | 0    | 4.67 | 15.66 |
| 259 | 0 | 0    | 4.6  | 15.66 |
| 260 | 0 | 0    | 5.02 | 16.61 |
| 261 | 0 | 0    | 3.9  | 25.71 |
| 262 | 0 | 0    | 4.44 | 34.38 |
| 263 | 1 | 0    | 4.28 | 31.45 |
| 264 | 0 | 0    | 4.19 | 39.51 |
| 265 | 0 | 6.8  | 4.44 | 39.7  |
| 266 | 0 | 3.8  | 4.5  | 39.7  |
| 267 | 0 | 0    | 4.39 | 39.7  |
| 268 | 0 | 0    | 4.9  | 21.29 |
| 269 | 0 | 0    | 4.81 | 21.29 |
| 270 | 0 | 0    | 5.05 | 15.3  |
| 271 | 0 | 0    | 4.92 | 21.31 |
| 272 | 0 | 0    | 4.47 | 6.98  |
| 273 | 0 | 0    | 3.94 | 5.14  |
| 274 | 0 | 0    | 4.18 | 7.38  |
| 275 | 0 | 0    | 4.64 | 9.07  |
| 276 | 0 | 0    | 4.05 | 7.38  |
| 277 | 0 | 0    | 3.83 | 5.14  |
| 278 | 0 | 0    | 4.05 | 7.38  |
| 279 | 0 | 0.39 | 4.47 | 11.45 |
| 280 | 0 | 0    | 4.53 | 11.8  |

**Table S9.** Numerical values of the QSAR anti-*L. infantum* model descriptors.

| ID | $c_1$ | $c_2$ | $c_3$     | $c_4$  | $c_5$ | $c_6$     |
|----|-------|-------|-----------|--------|-------|-----------|
| 1  | 0.06  | 0     | -3.44E+05 | 58.58  | 0.43  | -6.95E+04 |
| 2  | 0.19  | 0     | -3.47E+05 | 53.25  | 0.25  | -1.19E+04 |
| 3  | 0.01  | 0     | -3.42E+05 | 53.25  | 0.25  | -2.34E+04 |
| 4  | 0.04  | 0     | -3.41E+05 | 53.25  | 0.25  | -2.65E+04 |
| 5  | 0.16  | 0     | -3.35E+05 | 55.44  | 0.48  | -9.55E+03 |
| 6  | -0.02 | 0     | -3.29E+05 | 55.44  | 0.48  | -2.12E+04 |
| 7  | 0.02  | 0     | -3.28E+05 | 55.44  | 0.48  | -2.40E+04 |
| 8  | 0.16  | 0     | -3.34E+05 | 55.79  | 0.41  | -1.25E+05 |
| 9  | -0.01 | 0     | -3.33E+05 | 55.79  | 0.41  | -1.19E+05 |
| 10 | 0.04  | 0     | -3.33E+05 | 55.79  | 0.41  | -1.17E+05 |
| 11 | 0.14  | 0     | -3.24E+05 | 55.79  | 0.41  | -2.00E+05 |
| 12 | 0.01  | 0     | -3.25E+05 | 55.79  | 0.41  | -1.82E+05 |
| 13 | 0.05  | 0     | -3.26E+05 | 55.79  | 0.41  | -1.77E+05 |
| 14 | 0.08  | 0     | -3.64E+05 | 50.94  | 0.38  | 1.15E+05  |
| 15 | 0.01  | 0     | -3.56E+05 | 50.94  | 0.37  | 5.74E+04  |
| 16 | 0.06  | 0     | -3.54E+05 | 50.94  | 0.37  | 5.08E+04  |
| 17 | 0.07  | 0     | -3.79E+05 | 45.06  | 0.33  | 2.71E+05  |
| 18 | 0.09  | 0     | -3.58E+05 | 55.79  | 0.41  | -5.00E+04 |
| 19 | 0.04  | 0     | -3.53E+05 | 55.79  | 0.4   | -5.84E+04 |
| 20 | 0.05  | 0     | -3.52E+05 | 55.79  | 0.4   | -5.87E+04 |
| 21 | 0.09  | 0     | -3.48E+05 | 53.25  | 0.42  | -4.61E+04 |
| 22 | 0.05  | 0     | -3.43E+05 | 53.25  | 0.42  | -5.39E+04 |
| 23 | 0.05  | 0     | -3.42E+05 | 53.25  | 0.42  | -5.49E+04 |
| 24 | 0.07  | 0     | -3.48E+05 | 50.94  | 0.42  | -4.02E+04 |
| 25 | 0.04  | 0     | -3.41E+05 | 50.94  | 0.42  | -4.79E+04 |
| 26 | 0.05  | 0     | -3.39E+05 | 50.94  | 0.42  | -4.96E+04 |
| 27 | 0.16  | 0     | -3.97E+05 | 102.39 | 0.38  | 3.73E+05  |
| 28 | 0.25  | 0     | -3.96E+05 | 93.08  | 0.2   | 4.01E+05  |
| 29 | 0.1   | 1     | -3.90E+05 | 93.08  | 0.2   | 3.84E+05  |
| 30 | 0.13  | 0     | -3.89E+05 | 93.08  | 0.2   | 3.79E+05  |
| 31 | 0.22  | 0     | -3.81E+05 | 93.54  | 0.43  | 3.85E+05  |
| 32 | 0.07  | 1     | -3.76E+05 | 93.54  | 0.43  | 3.68E+05  |
| 33 | 0.1   | 0     | -3.74E+05 | 93.54  | 0.43  | 3.64E+05  |
| 34 | 0.23  | 0     | -3.85E+05 | 97.51  | 0.36  | 2.88E+05  |
| 35 | 0.09  | 1     | -3.84E+05 | 97.51  | 0.36  | 2.96E+05  |
| 36 | 0.13  | 0     | -3.84E+05 | 97.51  | 0.36  | 2.99E+05  |
| 37 | 0.23  | 0     | -3.75E+05 | 97.51  | 0.36  | 2.03E+05  |
| 38 | 0.12  | 1     | -3.76E+05 | 97.51  | 0.36  | 2.27E+05  |
| 39 | 0.15  | 0     | -3.77E+05 | 97.51  | 0.36  | 2.34E+05  |

|     |           |   |           |        |       |           |
|-----|-----------|---|-----------|--------|-------|-----------|
| 40  | 0.17      | 1 | -4.12E+05 | 89.03  | 0.33  | 5.13E+05  |
| 41  | 0.11      | 0 | -4.03E+05 | 89.03  | 0.33  | 4.57E+05  |
| 42  | 0.15      | 0 | -4.00E+05 | 89.03  | 0.33  | 4.43E+05  |
| 43  | 0.15      | 1 | -4.21E+05 | 78.76  | 0.29  | 6.30E+05  |
| 44  | 0.16      | 0 | -3.90E+05 | 93.08  | 0.37  | 3.49E+05  |
| 45  | 0.17      | 0 | -3.95E+05 | 89.03  | 0.38  | 3.56E+05  |
| 46  | 0.14      | 0 | -3.87E+05 | 89.03  | 0.38  | 3.42E+05  |
| 47  | 0.15      | 0 | -3.85E+05 | 89.03  | 0.38  | 3.38E+05  |
| 48  | 0.19      | 0 | -4.09E+05 | 97.51  | 0.36  | 3.77E+05  |
| 49  | 0.15      | 0 | -4.04E+05 | 97.51  | 0.35  | 3.67E+05  |
| 50  | 0.16      | 0 | -4.02E+05 | 97.51  | 0.35  | 3.64E+05  |
| 51  | 0.18      | 0 | -3.97E+05 | 93.08  | 0.38  | 3.63E+05  |
| 52  | 0.15      | 0 | -3.92E+05 | 93.08  | 0.37  | 3.52E+05  |
| 53  | 0.11      | 0 | -4.96E+05 | 13.15  | -0.02 | -2.47E+05 |
| 54  | -2.23E-03 | 0 | -4.87E+05 | 13.15  | -0.02 | -2.51E+05 |
| 55  | 0.08      | 0 | -4.77E+05 | 17.09  | 0.22  | -2.37E+05 |
| 56  | -0.02     | 0 | -4.68E+05 | 17.09  | 0.22  | -2.40E+05 |
| 57  | 0.08      | 0 | -5.12E+05 | 13.78  | 0.13  | -3.10E+05 |
| 58  | 0.04      | 0 | -5.05E+05 | 13.78  | 0.12  | -3.01E+05 |
| 59  | 0.07      | 0 | -4.96E+05 | 13.15  | 0.16  | -2.98E+05 |
| 60  | 0.05      | 0 | -4.88E+05 | 13.15  | 0.15  | -2.88E+05 |
| 61  | 0.06      | 0 | -4.91E+05 | 12.58  | 0.17  | -2.95E+05 |
| 62  | 0.04      | 0 | -4.80E+05 | 12.58  | 0.16  | -2.82E+05 |
| 63  | 0.08      | 0 | -3.43E+05 | 50.62  | 0.35  | 4.42E+03  |
| 64  | 0.07      | 0 | -3.35E+05 | 48.75  | 0.33  | -4.26E+04 |
| 65  | 0.03      | 0 | -3.35E+05 | 48.75  | 0.33  | -4.51E+04 |
| 66  | 0.12      | 1 | -3.37E+05 | 48.75  | 0.33  | -5.14E+04 |
| 67  | 0.06      | 0 | -3.26E+05 | 47.01  | 0.32  | -9.51E+04 |
| 68  | 0.04      | 1 | -3.28E+05 | 47.01  | 0.32  | -9.56E+04 |
| 281 | -0.06     | 0 | -2.84E+05 | 69.68  | 0.52  | -3.13E+05 |
| 282 | -0.01     | 0 | -3.28E+05 | 80.16  | 0.32  | 1.01E+05  |
| 283 | -0.06     | 0 | -4.03E+05 | 72.99  | 0.45  | 3.40E+04  |
| 284 | -0.08     | 0 | -3.64E+05 | 69.68  | 0.55  | -2.95E+05 |
| 285 | 0         | 0 | -3.96E+05 | 100.64 | 0.58  | 3.80E+04  |
| 286 | 0.07      | 0 | -2.72E+05 | 80.79  | 0.47  | 2.48E+04  |
| 222 | -0.04     | 0 | -2.42E+05 | 66.83  | 0.34  | 2.49E+04  |
| 223 | -2.75E-04 | 0 | -3.36E+05 | 44.39  | -0.04 | 2.22E+04  |
| 287 | 0.02      | 0 | -3.19E+05 | 64.19  | 0.34  | 2.98E+04  |
| 288 | -0.02     | 0 | -3.16E+05 | 84.24  | 0.33  | 8.64E+03  |
| 224 | -9.44E-04 | 0 | -3.05E+05 | 53.74  | 0.09  | 2.39E+04  |
| 225 | 0.03      | 0 | -3.10E+05 | 49.91  | 0.21  | 2.35E+04  |

|     |           |   |           |       |       |           |
|-----|-----------|---|-----------|-------|-------|-----------|
| 289 | 0.03      | 0 | -3.72E+05 | 83.68 | 0.3   | 1.52E+05  |
| 69  | 4.68E-03  | 0 | -3.23E+05 | 80.43 | 0.29  | 3.38E+04  |
| 290 | -0.09     | 0 | -3.71E+05 | 54.75 | 0.34  | 3.97E+04  |
| 291 | -0.01     | 0 | -4.15E+05 | 30.66 | 0.2   | 2.35E+04  |
| 292 | -0.13     | 0 | -3.71E+05 | 47.9  | 0.27  | 4.28E+04  |
| 294 | 4.57E-03  | 1 | -4.84E+05 | 6.15  | 0.1   | 1.50E+05  |
| 293 | -0.12     | 0 | -3.53E+05 | 42.58 | 0.27  | 3.97E+04  |
| 295 | -1.09E-03 | 0 | -4.55E+05 | 36.56 | 0.25  | 1.55E+05  |
| 296 | -0.14     | 0 | -4.66E+05 | 38.32 | -0.06 | 1.79E+05  |
| 297 | -0.06     | 4 | -3.29E+05 | 68.66 | 0.47  | 8.73E+04  |
| 298 | -0.06     | 4 | -3.29E+05 | 68.66 | 0.47  | 8.73E+04  |
| 299 | 0.1       | 0 | -3.62E+05 | 54.09 | 0.53  | 1.37E+05  |
| 300 | -0.08     | 2 | -3.94E+05 | 58.96 | 0.38  | 4.54E+04  |
| 301 | 0.09      | 2 | -3.85E+05 | 34.84 | 0.17  | 8.12E+04  |
| 302 | 0.01      | 0 | -3.23E+05 | 82.46 | 0.4   | -1.30E+05 |
| 303 | 0.01      | 0 | -3.20E+05 | 75.29 | 0.22  | -1.09E+05 |
| 304 | 0.01      | 0 | -3.06E+05 | 78.71 | 0.38  | -2.03E+05 |
| 305 | 0.01      | 0 | -3.13E+05 | 78.71 | 0.38  | -1.64E+05 |
| 306 | -0.01     | 0 | -3.20E+05 | 61.85 | 0.31  | -2.07E+05 |
| 307 | 0.02      | 0 | -3.32E+05 | 72.15 | 0.35  | -6.05E+04 |
| 308 | -3.21E-04 | 0 | -3.19E+05 | 78.71 | 0.38  | -1.26E+05 |
| 309 | -0.01     | 0 | -3.20E+05 | 61.85 | 0.31  | -2.07E+05 |
| 310 | -0.01     | 0 | -3.25E+05 | 61.85 | 0.31  | -1.76E+05 |
| 311 | -0.01     | 0 | -3.20E+05 | 59.71 | 0.27  | -2.08E+05 |
| 312 | -0.01     | 0 | -3.39E+05 | 61.85 | 0.31  | -1.56E+05 |
| 313 | 0         | 0 | -3.30E+05 | 59.71 | 0.19  | -1.32E+05 |
| 314 | -0.01     | 0 | -3.30E+05 | 61.85 | 0.31  | -1.46E+05 |
| 315 | 1.86E-03  | 0 | -3.40E+05 | 57.72 | 0.29  | -9.28E+04 |
| 316 | -0.01     | 0 | -3.39E+05 | 61.85 | 0.31  | -1.56E+05 |
| 317 | -0.01     | 0 | -3.33E+05 | 64.14 | 0.32  | -1.50E+05 |
| 318 | 0.01      | 0 | -3.41E+05 | 61.85 | 0.31  | -1.67E+05 |
| 319 | -0.01     | 0 | -3.79E+05 | 55.86 | 0.28  | -1.62E+05 |
| 320 | 0.01      | 0 | -3.77E+05 | 46.8  | 0.23  | -1.03E+05 |
| 321 | 0.01      | 0 | -3.60E+05 | 46.8  | 0.24  | -1.63E+05 |
| 322 | 0.01      | 0 | -3.65E+05 | 46.8  | 0.24  | -1.30E+05 |
| 323 | 0.01      | 0 | -3.74E+05 | 48.1  | 0.24  | -1.05E+05 |
| 324 | 0.01      | 0 | -3.61E+05 | 45.57 | 0.21  | -1.58E+05 |
| 325 | 0.02      | 0 | -3.77E+05 | 44.4  | 0.22  | -3.76E+04 |
| 326 | 0.02      | 0 | -3.70E+05 | 45.57 | 0.15  | -8.33E+04 |
| 327 | 4.63E-03  | 0 | -3.78E+05 | 46.8  | 0.23  | -1.04E+05 |
| 234 | 0.01      | 0 | -3.82E+05 | 46.8  | 0.23  | -1.07E+05 |

|     |           |   |           |       |       |           |
|-----|-----------|---|-----------|-------|-------|-----------|
| 235 | 0.03      | 0 | -4.33E+05 | 51.34 | 0.36  | 1.10E+05  |
| 236 | -2.01E-03 | 0 | -4.31E+05 | 55.85 | 0.37  | 1.58E+05  |
| 237 | -0.01     | 0 | -4.09E+05 | 53.52 | 0.36  | 1.64E+04  |
| 238 | -0.03     | 0 | -4.39E+05 | 49.4  | 0.27  | 2.38E+05  |
| 239 | 0.03      | 0 | -4.26E+05 | 47.23 | 0.21  | 1.36E+05  |
| 327 | 0.02      | 0 | -4.26E+05 | 47.23 | 0.21  | 1.37E+05  |
| 329 | -0.07     | 0 | -4.30E+05 | 60.35 | 0.4   | 1.69E+05  |
| 330 | -0.05     | 0 | -5.06E+05 | 0     | -0.18 | 1.31E+05  |
| 331 | 0.01      | 0 | -4.82E+05 | 0     | -0.13 | 1.55E+05  |
| 332 | -0.03     | 0 | -4.70E+05 | 0     | -0.07 | 4.71E+04  |
| 333 | 0.03      | 0 | -3.98E+05 | 0     | -0.19 | 9.85E+04  |
| 334 | -0.01     | 0 | -3.91E+05 | 20.28 | 0.05  | 9.55E+04  |
| 335 | -0.04     | 0 | -3.77E+05 | 19.47 | 0.05  | 9.17E+04  |
| 336 | 0.02      | 0 | -4.18E+05 | 0     | -0.09 | 8.56E+04  |
| 337 | 0.04      | 0 | -4.06E+05 | 0     | -0.09 | 4.90E+04  |
| 338 | 0.04      | 0 | -4.00E+05 | 0     | -0.09 | 1.26E+04  |
| 339 | -0.07     | 0 | -4.25E+05 | 0     | -0.18 | -4.90E+05 |
| 340 | 0.01      | 0 | -4.05E+05 | 0     | -0.13 | -4.36E+05 |
| 341 | -0.04     | 0 | -3.93E+05 | 0     | -0.07 | -5.12E+05 |
| 342 | 0.03      | 0 | -3.35E+05 | 0     | -0.19 | -3.80E+05 |
| 343 | -0.01     | 0 | -3.30E+05 | 20.28 | 0.05  | -3.67E+05 |
| 344 | -0.04     | 0 | -3.18E+05 | 19.47 | 0.05  | -3.53E+05 |
| 345 | 0.03      | 0 | -3.64E+05 | 0     | -0.09 | -3.25E+05 |
| 346 | 0.05      | 0 | -3.54E+05 | 0     | -0.09 | -3.47E+05 |
| 347 | 0.05      | 0 | -3.59E+05 | 0     | -0.19 | -2.83E+05 |
| 348 | 0.23      | 0 | -5.61E+05 | 10.34 | 0.07  | 2.65E+05  |
| 349 | 0.06      | 0 | -5.34E+05 | 9.04  | -0.14 | 3.06E+05  |
| 350 | 0.06      | 0 | -4.63E+05 | 37.09 | -0.08 | 3.13E+05  |
| 351 | 0.01      | 0 | -3.30E+05 | 0     | 0     | -3.09E+05 |
| 269 | 0.05      | 0 | -3.62E+05 | 53.81 | 0.15  | 1.09E+05  |
| 352 | 0.01      | 2 | -2.93E+05 | 87.73 | 0.68  | 1.16E+05  |
| 353 | -0.03     | 0 | -2.81E+05 | 84.22 | 0.67  | 1.07E+05  |
| 354 | 0.03      | 2 | -2.70E+05 | 77.98 | 0.51  | 1.06E+05  |
| 355 | 0.03      | 2 | -2.84E+05 | 84.22 | 0.62  | 1.12E+05  |
| 356 | 0.05      | 0 | -2.80E+05 | 68.8  | 0.37  | 8.85E+04  |
| 357 | 0.06      | 2 | -3.25E+05 | 58.98 | 0.35  | 1.17E+05  |
| 358 | 0.02      | 0 | -3.14E+05 | 56.94 | 0.34  | 1.10E+05  |

**Table S10.** Experimental and predicted values of anti-*L. amazonensis* activity. Residuals and influence values  $h$  ( $h^{\text{lim}} = 0.3125$ ) are reported. ^ validation group and \* test group

| ID   | Experimental activity | Predicted activity | Residuals | $h^{\text{lim}} = 0.3125$ |
|------|-----------------------|--------------------|-----------|---------------------------|
| 222  | 0.62                  | 1.22               | -0.6      | 0.04                      |
| 223  | 1.99                  | 2.52               | -0.53     | 0.03                      |
| 224  | 1.6                   | 0.99               | 0.61      | 0.02                      |
| 225  | 1.67                  | 1.25               | 0.42      | 0.02                      |
| 69   | 1.9                   | 1.85               | 0.05      | 0.02                      |
| 226  | 0.95                  | 1.13               | -0.18     | 0.04                      |
| 227  | 1.2                   | -0.62              | 1.82      | 0.03                      |
| 228  | 1.26                  | -0.31              | 1.57      | 0.04                      |
| 229  | 1.7                   | 0.22               | 1.48      | 0.05                      |
| 230  | 1.71                  | 0.37               | 1.34      | 0.05                      |
| 231  | 1.74                  | 0.66               | 1.08      | 0.04                      |
| 232  | 1.27                  | -0.89              | 2.16      | 0.03                      |
| 233  | 1.55                  | 0.42               | 1.13      | 0.02                      |
| 234  | 0.02                  | 0.38               | -0.36     | 0.2                       |
| 235  | 0.03                  | -0.14              | 0.17      | 0.2                       |
| 236^ | 0.06                  | -0.3               | 0.36      | 0.21                      |
| 237* | 0.14                  | 0.05               | 0.09      | 0.2                       |
| 238  | -0.3                  | -0.98              | 0.68      | 0.2                       |
| 239* | -0.4                  | -1.35              | 0.95      | 0.2                       |
| 240  | 0.24                  | 0.51               | -0.27     | 0.2                       |
| 241* | 1.3                   | 1.3                | 0         | 0.06                      |
| 242  | 0.9                   | -0.91              | 1.81      | 0.06                      |
| 243  | 1.38                  | 0.6                | 0.78      | 0.06                      |
| 244^ | 1.36                  | 0.49               | 0.87      | 0.12                      |
| 245  | 1.48                  | 0.26               | 1.22      | 0.04                      |
| 246  | 1.45                  | 0.48               | 0.97      | 0.04                      |
| 247  | 0.7                   | -1.11              | 1.81      | 0.01                      |
| 248  | 0.93                  | 0.43               | 0.5       | 0.01                      |
| 249^ | 0.85                  | -1.52              | 2.37      | 0.02                      |
| 250  | 0.78                  | -1.16              | 1.94      | 0.01                      |
| 251  | 1.34                  | -0.43              | 1.77      | 0.03                      |
| 252  | 1.94                  | 0.78               | 1.16      | 0.04                      |
| 253  | 1.38                  | 0.02               | 1.36      | 0.02                      |
| 254  | 1.13                  | -1.42              | 2.55      | 0.03                      |
| 255  | 1.67                  | 0.27               | 1.4       | 0.03                      |
| 256  | 1.52                  | -0.24              | 1.76      | 0.03                      |



|      |       |       |       |       |
|------|-------|-------|-------|-------|
| 257  | 1.88  | 0.87  | 1.01  | 0.03  |
| 258  | 2.13  | 2.06  | 0.07  | 0.03  |
| 259  | 1.29  | -0.45 | 1.74  | 0.03  |
| 260  | 1.09  | -1.49 | 2.58  | 0.03  |
| 261  | 0.85  | 0.64  | 0.21  | 0.09  |
| 262  | 0.72  | 0.83  | -0.11 | 0.19  |
| 263  | -0.4  | 0.23  | -0.63 | 0.22  |
| 264  | -0.52 | -1.91 | 1.39  | 0.32  |
| 265  | 1.84  | -0.01 | 1.85  | 1     |
| 266* | 0.89  | -0.77 | 1.66  | 0.537 |
| 267^ | -0.22 | -1.21 | 0.99  | 0.31  |
| 268^ | 1.51  | 0.69  | 0.82  | 0.04  |
| 269* | 1.8   | 1.71  | 0.09  | 0.04  |
| 270  | 1.5   | -0.46 | 1.96  | 0.03  |
| 271  | 1.78  | 1.52  | 0.26  | 0.04  |
| 272* | 1.45  | -1.13 | 2.58  | 0.06  |
| 273  | 1.38  | 0.91  | 0.47  | 0.06  |
| 274  | 1.46  | -0.65 | 2.11  | 0.05  |
| 275  | 1.63  | -0.47 | 2.1   | 0.05  |
| 276  | 1.62  | 0.65  | 0.97  | 0.04  |
| 277  | 1.34  | -0.9  | 2.24  | 0.05  |
| 278^ | 1.29  | -0.99 | 2.28  | 0.04  |
| 279  | 1.72  | 0.12  | 1.6   | 0.04  |
| 280  | 1.45  | -0.48 | 1.93  | 0.03  |

**Table S11.** *Experimental* and predicted values of anti-L. infantum activity. Residuals and influence values  $h$  ( $h^{\text{lim}} = 0.24$ ) are reported. ^ validation group and \* test group

| ID   | Experimental activity | Predicted activity | Residuals | $h^{\text{lim}} = 0.24$ |
|------|-----------------------|--------------------|-----------|-------------------------|
| 281^ | 1.13                  | 0.13               | 1         | 0.13                    |
| 282  | 1.26                  | 0.03               | 1.23      | 0.06                    |
| 283* | 1.38                  | 1.52               | -0.14     | 0.06                    |
| 284  | 1.29                  | 0.48               | 0.81      | 0.15                    |
| 285  | 2.1                   | 1.12               | 0.98      | 0.07                    |
| 286  | 1.21                  | 0.2                | 1.01      | 0.07                    |
| 222  | 0.35                  | 0.12               | 0.23      | 0.03                    |
| 223  | 1.45                  | -0.33              | 1.78      | 0.1                     |
| 287^ | 1.65                  | 1.5                | 0.15      | 0.03                    |
| 288  | 1.82                  | 0.45               | 1.37      | 0.07                    |
| 224  | 1.41                  | 0.18               | 1.23      | 0.06                    |
| 225  | 1.59                  | 1.44               | 0.15      | 0.02                    |
| 289  | 1.74                  | 0.04               | 1.7       | 0.09                    |
| 69   | 2.13                  | 0.96               | 1.17      | 0.07                    |
| 290  | 0.08                  | 0.04               | 0.04      | 0.07                    |
| 291  | 0.46                  | 0.19               | 0.27      | 0.04                    |
| 292  | -0.15                 | 0.33               | -0.48     | 0.12                    |
| 294^ | 0                     | 0.04               | -0.04     | 0.12                    |
| 293  | -0.15                 | 0.66               | -0.81     | 0.11                    |
| 295  | 0.65                  | 1.07               | -0.42     | 0.06                    |
| 296  | -0.1                  | -1.07              | 0.97      | 0.24                    |
| 297  | 0.72                  | -0.89              | 1.61      | 0.34                    |
| 298  | 1.13                  | 0.34               | 0.79      | 0.04                    |
| 299  | 0.38                  | 0.46               | -0.08     | 0.18                    |
| 300  | 0.43                  | -0.68              | 1.11      | 0.11                    |
| 301  | 2.09                  | 1.06               | 1.03      | 0.15                    |
| 302  | 1.88                  | -0.29              | 2.17      | 0.05                    |
| 303  | 1.93                  | -0.83              | 2.76      | 0.09                    |
| 304* | 2.11                  | -0.05              | 2.16      | 0.06                    |
| 305  | 2.28                  | 0.61               | 1.67      | 0.05                    |
| 306  | 0.93                  | -1.7               | 2.63      | 0.04                    |
| 307  | 2.28                  | 1.47               | 0.81      | 0.03                    |
| 308  | 1.32                  | -1.16              | 2.48      | 0.04                    |
| 309  | 1.46                  | -0.51              | 1.97      | 0.04                    |
| 310  | 1.65                  | 0.14               | 1.51      | 0.03                    |
| 311* | 1.86                  | 0.24               | 1.62      | 0.04                    |

|      |      |       |       |      |
|------|------|-------|-------|------|
| 312  | 1.84 | 0.66  | 1.18  | 0.03 |
| 313  | 1.77 | -0.2  | 1.97  | 0.04 |
| 314* | 0.96 | -1.15 | 2.11  | 0.03 |
| 315  | 1.42 | 0.23  | 1.19  | 0.02 |
| 316  | 1.44 | -0.24 | 1.68  | 0.03 |
| 317* | 1.49 | -0.17 | 1.66  | 0.03 |
| 318^ | 1.44 | -0.64 | 2.08  | 0.03 |
| 319  | 2.03 | 0.99  | 1.04  | 0.03 |
| 320^ | 1.69 | 0.82  | 0.87  | 0.02 |
| 321  | 1.71 | 0.46  | 1.25  | 0.03 |
| 322* | 1.6  | 0.44  | 1.16  | 0.02 |
| 323  | 1.31 | -0.09 | 1.4   | 0.02 |
| 324* | 2.08 | 1.18  | 0.9   | 0.02 |
| 325  | 0.91 | -0.4  | 1.31  | 0.02 |
| 326  | 1.75 | 0.38  | 1.37  | 0.02 |
| 327  | 1.92 | 1.33  | 0.59  | 0.02 |
| 234  | 0.08 | -2.93 | 3.01  | 0.02 |
| 235  | 0    | -1.43 | 1.43  | 0.06 |
| 236  | 0.26 | -0.22 | 0.48  | 0.06 |
| 237  | 0.3  | -0.9  | 1.2   | 0.04 |
| 238  | 0.34 | 0.74  | -0.4  | 0.07 |
| 239  | 0.15 | -1.72 | 1.87  | 0.03 |
| 327* | 0.68 | -0.41 | 1.09  | 0.03 |
| 329  | -0.3 | -0.41 | 0.11  | 0.09 |
| 330  | 0.73 | 0.97  | -0.24 | 0.13 |
| 331  | 0.56 | 0.45  | 0.11  | 0.09 |
| 332^ | 0.38 | 0.39  | -0.01 | 0.08 |
| 333  | 0.49 | -0.14 | 0.63  | 0.07 |
| 334  | 0.34 | 0.35  | -0.01 | 0.03 |
| 335  | -0.4 | -0.8  | 0.4   | 0.04 |
| 336  | 0.11 | -0.39 | 0.5   | 0.06 |
| 337* | 0.28 | -0.5  | 0.78  | 0.05 |
| 338  | 0.04 | -1.23 | 1.27  | 0.05 |
| 339^ | 2.26 | 0.26  | 2     | 0.17 |
| 340  | 1.7  | -1.26 | 2.96  | 0.12 |
| 341  | 2.18 | 0.58  | 1.6   | 0.15 |
| 342* | 1.71 | -0.91 | 2.62  | 0.11 |
| 343  | 1.45 | -0.48 | 1.93  | 0.07 |
| 344  | 2.14 | 1.79  | 0.35  | 0.07 |
| 345  | 2.29 | 1.5   | 0.79  | 0.08 |
| 346  | 2.19 | 0.86  | 1.33  | 0.09 |

|      |       |       |       |      |
|------|-------|-------|-------|------|
| 347  | 2.1   | 0.28  | 1.82  | 0.09 |
| 348  | 1.28  | -0.31 | 1.59  | 0.35 |
| 349  | 0.57  | -0.36 | 0.93  | 0.13 |
| 350  | 2.07  | 1.84  | 0.23  | 0.15 |
| 351  | 0.62  | -0.76 | 1.38  | 0.08 |
| 269  | 0.92  | -0.98 | 1.9   | 0.05 |
| 352^ | -0.15 | -1.93 | 1.78  | 0.13 |
| 353  | -0.52 | -0.63 | 0.11  | 0.12 |
| 354  | 0.9   | -0.46 | 1.36  | 0.11 |
| 355  | 1.75  | 1.78  | -0.03 | 0.12 |
| 356  | -0.1  | -2.15 | 2.05  | 0.04 |
| 357^ | 0.92  | -0.89 | 1.81  | 0.11 |
| 358  | 0.91  | 1.2   | -0.29 | 0.03 |

**Table S12.** Values predicted by the QSAR models of antileishmanial activity of the 68 naphthoquinone derivatives (prediction group).

| ID | Predicted<br><i>anti-L.<br/>amazonensis</i><br>activity | <i>h</i> * | Predicted anti-<br><i>L. infantum</i><br>activity | <i>h</i> * |
|----|---------------------------------------------------------|------------|---------------------------------------------------|------------|
| 1  | 1.18                                                    | 0.02       | 1.13                                              | 0.07       |
| 2  | 1.34                                                    | 0.03       | 2.29                                              | 0.2        |
| 3  | 1.35                                                    | 0.03       | 1.08                                              | 0.02       |
| 4  | 1.27                                                    | 0.03       | 1.33                                              | 0.03       |
| 5  | 1.32                                                    | 0.03       | 1.27                                              | 0.21       |
| 6  | 1.34                                                    | 0.03       | 0.1                                               | 0.08       |
| 7  | 1.28                                                    | 0.03       | 0.35                                              | 0.08       |
| 8  | 1.27                                                    | 0.02       | 1.98                                              | 0.2        |
| 9  | 1.29                                                    | 0.03       | 0.8                                               | 0.05       |
| 10 | 1.23                                                    | 0.03       | 1.11                                              | 0.06       |
| 11 | 1.27                                                    | 0.02       | 2.1                                               | 0.18       |
| 12 | 1.29                                                    | 0.03       | 1.11                                              | 0.06       |
| 13 | 1.23                                                    | 0.03       | 1.36                                              | 0.07       |
| 14 | 1.3                                                     | 0.02       | 0.58                                              | 0.08       |
| 15 | 1.34                                                    | 0.03       | 0.29                                              | 0.05       |
| 16 | 1.23                                                    | 0.03       | 0.63                                              | 0.06       |
| 17 | 1.39                                                    | 0.03       | -0.05                                             | 0.09       |
| 18 | 1.29                                                    | 0.02       | 1.32                                              | 0.09       |
| 19 | 1.33                                                    | 0.03       | 1.03                                              | 0.06       |
| 20 | 1.22                                                    | 0.03       | 1.06                                              | 0.06       |
| 21 | 1.24                                                    | 0.03       | 1.09                                              | 0.1        |

|    |      |      |      |      |
|----|------|------|------|------|
| 22 | 1.29 | 0.03 | 0.85 | 0.07 |
| 23 | 1.23 | 0.03 | 0.89 | 0.08 |
| 24 | 1.22 | 0.03 | 0.87 | 0.1  |
| 25 | 1.25 | 0.03 | 0.67 | 0.07 |
| 26 | 1.17 | 0.03 | 0.73 | 0.08 |
| 27 | 1.16 | 0.02 | 2.33 | 0.31 |
| 28 | 1.32 | 0.03 | 3.13 | 0.57 |
| 29 | 1.33 | 0.03 | 2.41 | 0.33 |
| 30 | 1.25 | 0.03 | 2.34 | 0.33 |
| 31 | 1.29 | 0.03 | 2.1  | 0.37 |
| 32 | 1.32 | 0.03 | 1.42 | 0.15 |
| 33 | 1.26 | 0.03 | 1.34 | 0.17 |
| 34 | 1.25 | 0.02 | 2.96 | 0.42 |
| 35 | 1.26 | 0.03 | 2.26 | 0.2  |
| 36 | 1.2  | 0.03 | 2.23 | 0.23 |
| 37 | 1.25 | 0.02 | 3.18 | 0.39 |
| 38 | 1.26 | 0.03 | 2.63 | 0.22 |
| 39 | 1.2  | 0.03 | 2.54 | 0.24 |
| 40 | 1.28 | 0.02 | 1.85 | 0.33 |
| 41 | 1.31 | 0.03 | 1.35 | 0.22 |
| 42 | 2.67 | 0.94 | 1.68 | 0.27 |
| 43 | 2.9  | 1.09 | 1.09 | 0.33 |
| 44 | 1.22 | 0.02 | 2.64 | 0.34 |
| 45 | 1.19 | 0.03 | 1.88 | 0.27 |
| 46 | 1.19 | 0.03 | 1.6  | 0.28 |
| 47 | 1.18 | 0.03 | 0.87 | 0.3  |
| 48 | 1.27 | 0.02 | 2.44 | 0.24 |
| 49 | 1.3  | 0.03 | 2.21 | 0.25 |
| 50 | 1.2  | 0.03 | 2.25 | 0.25 |
| 51 | 1.22 | 0.03 | 2.16 | 0.21 |
| 52 | 1.27 | 0.03 | 1.98 | 0.22 |
| 53 | 1.22 | 0.02 | 2.64 | 0.12 |
| 54 | 1.19 | 0.03 | 1.88 | 0.07 |
| 55 | 1.19 | 0.03 | 1.6  | 0.17 |
| 56 | 1.18 | 0.03 | 0.87 | 0.14 |
| 57 | 1.16 | 0.02 | 2.2  | 0.16 |
| 58 | 1.16 | 0.03 | 1.93 | 0.13 |
| 59 | 1.13 | 0.03 | 1.94 | 0.17 |
| 60 | 1.13 | 0.03 | 1.73 | 0.14 |
| 61 | 1.14 | 0.03 | 1.73 | 0.16 |
| 62 | 1.11 | 0.03 | 1.56 | 0.15 |

|    |      |      |      |      |
|----|------|------|------|------|
| 63 | 1.32 | 0.03 | 1.05 | 0.07 |
| 64 | 2.57 | 0.68 | 1.08 | 0.06 |
| 65 | 1.37 | 0.03 | 0.79 | 0.04 |
| 66 | 1.35 | 0.03 | 1.73 | 0.12 |
| 67 | 2.65 | 0.73 | 1.14 | 0.05 |
| 68 | 2.68 | 0.75 | 1.31 | 0.05 |

**Table S13.** Intercorrelation matrix of the QSAR model descriptors for toxicity.

| Descriptor | $d_1$ | $d_2$    | $d_3$ | $d_4$    | $d_5$    | VIF  |
|------------|-------|----------|-------|----------|----------|------|
| $d_2$      | 1     | 4.05E-03 | 0.03  | 0.07     | 5.03E-04 | 1.04 |
| $d_2$      |       | 1        | 0.18  | 2.05E-05 | 0.10     | 1.08 |
| $d_3$      |       |          | 1     | 0.22     | 0.44     | 1.53 |
| $d_4$      |       |          |       | 1        | 0.31     | 1.28 |
| $d_5$      |       |          |       | 0.31     | 1        | 1.39 |

**Table S14.** Numerical values of the QSAR toxicity model descriptors.

| ID | $d_1$ | $d_2$ | $d_3$ | $d_4$ | $d_5$ |
|----|-------|-------|-------|-------|-------|
| 1  | 4.44  | 0.22  | 1.67  | 15.60 | 0.73  |
| 2  | 4.67  | 0.65  | 1.70  | 9.26  | 0.62  |
| 3  | 4.79  | 0.87  | 1.67  | 9.43  | 0.76  |
| 4  | 4.80  | 0.94  | 1.66  | 9.50  | 0.80  |
| 5  | 5.01  | 0.76  | 1.69  | 16.83 | 0.81  |
| 6  | 5.13  | 0.91  | 1.66  | 17.23 | 0.94  |
| 7  | 5.15  | 0.98  | 1.66  | 17.31 | 0.99  |
| 8  | 4.83  | 1.03  | 1.62  | 11.13 | 0.83  |
| 9  | 4.87  | 0.75  | 1.61  | 11.73 | 0.88  |
| 10 | 4.87  | 0.78  | 1.61  | 11.83 | 0.89  |
| 11 | 4.68  | -0.02 | 1.68  | 6.70  | 0.89  |
| 12 | 4.87  | -0.21 | 1.65  | 7.03  | 0.91  |
| 13 | 4.87  | -0.15 | 1.64  | 7.08  | 0.91  |
| 14 | 5.14  | 1.26  | 1.81  | 8.70  | 1.26  |
| 15 | 5.18  | 0.76  | 1.76  | 8.57  | 1.29  |
| 16 | 5.19  | 0.71  | 1.73  | 8.55  | 1.29  |
| 17 | 5.94  | 0.41  | 1.86  | 3.85  | 1.82  |
| 18 | 4.79  | 0.27  | 1.64  | 16.33 | 0.92  |
| 19 | 4.89  | 0.11  | 1.62  | 16.27 | 0.91  |
| 20 | 4.87  | 0.08  | 1.62  | 16.32 | 0.91  |
| 21 | 5.22  | 0.46  | 1.63  | 17.06 | 1.11  |
| 22 | 5.32  | 0.28  | 1.61  | 17.00 | 1.10  |
| 23 | 5.30  | 0.24  | 1.60  | 17.05 | 1.10  |

|    |      |       |      |       |       |
|----|------|-------|------|-------|-------|
| 24 | 5.64 | 0.62  | 1.61 | 17.65 | 1.30  |
| 25 | 5.73 | 0.43  | 1.59 | 17.73 | 1.28  |
| 26 | 5.72 | 0.37  | 1.58 | 17.77 | 1.28  |
| 27 | 1.88 | 0.37  | 1.68 | 11.18 | 0.94  |
| 28 | 2.18 | 0.77  | 1.70 | 7.18  | 0.79  |
| 29 | 2.27 | 1.00  | 1.67 | 7.28  | 0.94  |
| 30 | 2.28 | 1.08  | 1.67 | 7.18  | 0.99  |
| 31 | 2.50 | 0.89  | 1.70 | 10.52 | 0.98  |
| 32 | 2.59 | 1.05  | 1.67 | 11.15 | 1.13  |
| 33 | 2.60 | 1.13  | 1.66 | 11.29 | 1.18  |
| 34 | 2.25 | 1.14  | 1.62 | 6.58  | 1.03  |
| 35 | 2.28 | 0.88  | 1.62 | 7.05  | 1.10  |
| 36 | 2.28 | 0.92  | 1.62 | 7.09  | 1.11  |
| 37 | 2.15 | 0.08  | 1.68 | 8.76  | 1.10  |
| 38 | 2.28 | -0.11 | 1.65 | 8.57  | 1.13  |
| 39 | 2.28 | -0.05 | 1.64 | 8.55  | 1.13  |
| 40 | 2.57 | 1.40  | 1.81 | 9.30  | 1.50  |
| 41 | 0.44 | 0.83  | 1.99 | 11.83 | 1.56  |
| 42 | 0.45 | 0.78  | 1.94 | 11.90 | 1.55  |
| 43 | 3.31 | 0.50  | 1.86 | 3.86  | 2.07  |
| 44 | 1.95 | -0.87 | 3.45 | 17.08 | -0.13 |
| 45 | 1.94 | -0.77 | 3.41 | 16.89 | 0.01  |
| 46 | 2.29 | -0.74 | 3.44 | 2.21  | 0.03  |
| 47 | 2.28 | -0.66 | 3.40 | 2.11  | 0.17  |
| 48 | 2.22 | 0.42  | 1.64 | 11.62 | 1.14  |
| 49 | 2.29 | 0.24  | 1.63 | 11.86 | 1.13  |
| 50 | 2.28 | 0.21  | 1.63 | 11.95 | 1.13  |
| 51 | 2.61 | 0.61  | 1.63 | 12.47 | 1.33  |
| 52 | 2.68 | 0.42  | 1.61 | 12.63 | 1.32  |
| 53 | 2.67 | 0.37  | 1.61 | 12.72 | 1.32  |
| 54 | 2.98 | 0.78  | 1.61 | 12.99 | 1.53  |
| 55 | 3.05 | 0.57  | 1.59 | 13.38 | 1.51  |
| 56 | 3.04 | 0.51  | 1.58 | 13.46 | 1.51  |
| 57 | 1.81 | -0.50 | 3.45 | 2.29  | 0.39  |
| 58 | 1.79 | -0.56 | 3.43 | 2.68  | 0.39  |
| 59 | 2.19 | -0.37 | 3.44 | 2.87  | 0.55  |
| 60 | 2.17 | -0.43 | 3.41 | 2.81  | 0.55  |
| 61 | 2.56 | -0.25 | 3.42 | 2.97  | 0.72  |
| 62 | 2.54 | -0.32 | 3.37 | 2.92  | 0.72  |
| 63 | 3.34 | -0.09 | 1.63 | 6.37  | 1.53  |
| 64 | 3.66 | 0.12  | 1.58 | 5.31  | 1.69  |
| 65 | 3.66 | 0.10  | 1.58 | 5.24  | 1.69  |

|     |      |       |      |       |       |
|-----|------|-------|------|-------|-------|
| 66  | 3.64 | 0.35  | 1.58 | 4.99  | 1.68  |
| 67  | 3.97 | 0.09  | 1.53 | 3.68  | 1.84  |
| 68  | 3.95 | -0.36 | 1.53 | 4.00  | 1.84  |
| 359 | 4.95 | 1.50  | 1.56 | 6.16  | 1.61  |
| 360 | 4.94 | 1.64  | 1.56 | 3.95  | 0.94  |
| 361 | 5.32 | 1.69  | 1.53 | 9.09  | 1.79  |
| 362 | 4.83 | 0.61  | 1.54 | 6.31  | 1.29  |
| 363 | 5.75 | 0.39  | 1.73 | 13.73 | 0.23  |
| 364 | 4.88 | 0.64  | 1.52 | 6.38  | 1.31  |
| 365 | 1.22 | -0.05 | 1.41 | 5.57  | -0.01 |
| 366 | 1.38 | -0.08 | 1.39 | 7.96  | -0.07 |
| 367 | 7.54 | 1.75  | 1.50 | 12.95 | 1.84  |
| 368 | 7.37 | 0.69  | 1.40 | 18.81 | 1.52  |
| 369 | 7.37 | 1.31  | 1.42 | 16.03 | 1.52  |
| 370 | 7.37 | 0.77  | 1.38 | 18.04 | 1.52  |
| 371 | 7.13 | 1.22  | 1.41 | 20.24 | 1.51  |
| 372 | 7.35 | 1.53  | 1.36 | 9.49  | 1.51  |
| 373 | 7.53 | 1.80  | 1.52 | 12.97 | 1.85  |
| 374 | 7.35 | 0.63  | 1.41 | 19.02 | 1.52  |
| 375 | 6.26 | 0.75  | 1.96 | 6.45  | 1.15  |
| 376 | 2.37 | 1.18  | 0.98 | 5.31  | 0.42  |
| 377 | 4.00 | 0.95  | 1.34 | 1.81  | 1.38  |
| 160 | 3.09 | 0.23  | 1.33 | 3.38  | 0.93  |
| 78  | 4.79 | 1.71  | 1.36 | 5.87  | 2.70  |
| 162 | 4.78 | 1.37  | 1.32 | 5.88  | 1.87  |
| 378 | 4.94 | 0.06  | 2.93 | 0.93  | -0.66 |
| 379 | 5.37 | 0.31  | 2.92 | 0.12  | -0.55 |
| 380 | 5.75 | 0.36  | 2.91 | 1.37  | -0.45 |
| 381 | 5.85 | 0.62  | 2.89 | 1.42  | -0.45 |
| 382 | 6.37 | 0.98  | 2.84 | 1.49  | -0.34 |
| 383 | 6.14 | 1.22  | 2.77 | 5.50  | 0.62  |
| 384 | 6.22 | 0.62  | 2.88 | 0.17  | -0.35 |
| 385 | 6.12 | 0.41  | 2.88 | 2.65  | -0.35 |
| 386 | 6.59 | 0.65  | 2.86 | 1.81  | -0.25 |
| 387 | 5.36 | 0.32  | 2.47 | 1.59  | -0.02 |
| 388 | 5.84 | 0.47  | 2.82 | 0.68  | -0.45 |
| 389 | 6.22 | 0.61  | 2.81 | 0.79  | -0.35 |
| 390 | 7.20 | 0.84  | 2.78 | 2.29  | -0.06 |
| 391 | 7.80 | 0.89  | 2.24 | 1.96  | -0.04 |
| 392 | 7.35 | 0.61  | 2.65 | 1.40  | -0.21 |
| 393 | 8.77 | 1.10  | 2.26 | 2.24  | 0.19  |
| 394 | 7.69 | 0.67  | 2.59 | 1.59  | -0.11 |



|     |      |       |      |       |       |
|-----|------|-------|------|-------|-------|
| 395 | 8.44 | 0.90  | 2.52 | 2.05  | 0.07  |
| 396 | 7.69 | 0.18  | 2.57 | 5.01  | -0.08 |
| 397 | 7.91 | -0.21 | 2.54 | 6.85  | -0.02 |
| 398 | 7.72 | 0.01  | 2.57 | 1.93  | -0.11 |
| 399 | 8.08 | -0.22 | 2.52 | 7.79  | -0.01 |
| 400 | 8.79 | -0.02 | 2.46 | 6.80  | 0.05  |
| 401 | 9.15 | -0.35 | 2.41 | 5.45  | 0.26  |
| 402 | 4.46 | 0.22  | 3.78 | 2.90  | -0.35 |
| 403 | 5.03 | -0.34 | 2.88 | 0.87  | -0.50 |
| 404 | 3.86 | 0.16  | 3.38 | 1.50  | -0.35 |
| 405 | 4.24 | -0.27 | 2.94 | 1.14  | -0.41 |
| 406 | 4.69 | -0.31 | 2.82 | 0.85  | -0.27 |
| 407 | 4.85 | -0.26 | 2.82 | 1.00  | -0.22 |
| 408 | 2.65 | -0.90 | 3.00 | 0.46  | -0.48 |
| 409 | 4.04 | 1.50  | 1.99 | 3.33  | 0.08  |
| 410 | 3.57 | 1.43  | 2.01 | 3.78  | 0.00  |
| 411 | 3.63 | 1.27  | 2.05 | -0.16 | -0.09 |
| 412 | 4.43 | 1.71  | 2.02 | 0.62  | 0.23  |
| 413 | 4.17 | 1.56  | 2.15 | 3.00  | 0.18  |
| 414 | 3.70 | 1.48  | 2.21 | 1.47  | 0.01  |
| 415 | 3.75 | 1.34  | 2.21 | 0.67  | 0.02  |
| 416 | 4.57 | 1.77  | 2.17 | 2.01  | 0.33  |
| 191 | 3.38 | 1.61  | 1.90 | -1.25 | 1.17  |
| 417 | 2.97 | 1.40  | 1.94 | 1.96  | 1.00  |
| 418 | 3.76 | 1.84  | 1.91 | 3.80  | 1.43  |
| 419 | 5.53 | 1.82  | 1.61 | 3.77  | 0.22  |
| 420 | 6.45 | 1.45  | 1.53 | 0.72  | 0.61  |
| 421 | 6.20 | 1.46  | 1.55 | 9.30  | 0.13  |
| 422 | 5.49 | -0.11 | 2.62 | 9.82  | 1.54  |
| 423 | 6.73 | 1.11  | 2.25 | 6.97  | 2.11  |
| 424 | 5.11 | -0.57 | 2.43 | 10.13 | 2.62  |
| 425 | 5.63 | 1.81  | 1.14 | 3.95  | 2.17  |
| 426 | 5.63 | 0.40  | 1.16 | 11.86 | 2.18  |
| 427 | 5.63 | 0.03  | 1.18 | 12.77 | 2.19  |
| 428 | 5.68 | 1.73  | 1.33 | 11.50 | 2.58  |
| 429 | 5.25 | 0.51  | 1.17 | 1.40  | 1.99  |
| 430 | 6.12 | 0.34  | 1.41 | 1.09  | 0.91  |

**Table S15.** Experimental and predicted values of toxicity. Residuals and influence values  $h$  ( $h^{\text{lim}} = 0.3125$ ) are reported. ^ validation group and \* test group

| ID   | Experimental activity | Predicted activity | Residuals | $h^{\text{lim}} = 0.3125$ |
|------|-----------------------|--------------------|-----------|---------------------------|
| 359  | 0.70                  | 0.61               | 0.09      | 0.05                      |
| 360  | 0.59                  | -1.15              | 1.73      | 0.04                      |
| 361* | 1.10                  | 3.96               | -2.86     | 0.06                      |
| 362  | 0.92                  | 0.65               | 0.27      | 0.03                      |
| 363  | 0.92                  | 0.11               | 0.81      | 0.42                      |
| 364^ | 0.82                  | 0.16               | 0.66      | 0.03                      |
| 365  | 0.72                  | -0.29              | 1.00      | 0.06                      |
| 366  | 0.83                  | 0.88               | -0.05     | 0.1                       |
| 367^ | 0.14                  | -1.72              | 1.86      | 0.08                      |
| 368  | 0.38                  | 0.01               | 0.37      | 0.14                      |
| 369  | 0.36                  | 0.11               | 0.26      | -0.15                     |
| 370^ | 0.27                  | -0.72              | 0.99      | 0.13                      |
| 371  | -0.13                 | -1.80              | 1.67      | 0.19                      |
| 372^ | 0.51                  | -0.71              | 1.22      | 0.07                      |
| 373  | 0.66                  | 1.35               | -0.69     | 0.08                      |
| 374  | 0.58                  | 1.17               | -0.59     | 0.15                      |
| 375  | 1.14                  | 0.22               | 0.92      | 0.02                      |
| 376  | 0.52                  | 0.57               | -0.06     | 0.04                      |
| 377^ | 0.98                  | 1.18               | -0.20     | 0.05                      |
| 160  | 0.79                  | -0.21              | 1.00      | 0.02                      |
| 78   | 0.38                  | 0.57               | -0.19     | 0.13                      |
| 162  | 0.45                  | -0.17              | 0.62      | 0.06                      |
| 378  | 2.07                  | 0.23               | 1.84      | 0.06                      |
| 379* | 2.03                  | -0.11              | 2.13      | 0.05                      |
| 380  | 1.90                  | -0.51              | 2.41      | 0.05                      |
| 381  | 1.90                  | -0.22              | 2.12      | 0.05                      |
| 382  | 1.93                  | 0.31               | 1.62      | 0.05                      |
| 383  | 1.21                  | -1.23              | 2.44      | 0.04                      |
| 384^ | 2.00                  | -0.09              | 2.09      | 0.05                      |
| 385  | 2.20                  | 1.51               | 0.68      | 0.04                      |
| 386* | 1.90                  | -0.29              | 2.19      | 0.04                      |
| 387  | 1.98                  | 1.56               | 0.43      | 0.03                      |
| 388  | 1.60                  | -2.17              | 3.77      | 0.04                      |
| 389  | 1.93                  | -0.21              | 2.13      | 0.04                      |
| 390  | 1.90                  | 0.07               | 1.83      | 0.04                      |
| 391  | 2.08                  | 1.86               | 0.22      | 0.07                      |
| 392* | 1.61                  | -2.11              | 3.72      | 0.05                      |
| 393  | 1.61                  | 0.10               | 1.51      | -0.94                     |

|      |      |       |       |       |
|------|------|-------|-------|-------|
| 394  | 1.90 | -0.27 | 2.17  | 0.06  |
| 395  | 1.86 | -0.27 | 2.13  | 0.08  |
| 396  | 2.00 | 0.73  | 1.27  | 0.05  |
| 397  | 1.83 | -0.25 | 2.07  | 0.08  |
| 398  | 2.12 | 0.30  | 1.82  | 0.08  |
| 399  | 1.65 | -1.12 | 2.77  | 0.08  |
| 400  | 1.86 | -0.17 | 2.03  | 0.09  |
| 401  | 2.05 | 0.24  | 1.81  | 0.14  |
| 402  | 2.25 | 0.79  | 1.46  | 0.15  |
| 403* | 2.24 | 0.93  | 1.32  | 0.07  |
| 404  | 2.09 | 0.63  | 1.46  | 0.12  |
| 405* | 2.07 | 0.56  | 1.51  | 0.08  |
| 406^ | 1.65 | -1.90 | 3.55  | 0.07  |
| 407  | 2.06 | 0.55  | 1.51  | 0.06  |
| 408  | 1.70 | -1.76 | 3.46  | 0.16  |
| 409  | 1.11 | 0.35  | 0.76  | 0.06  |
| 410  | 0.67 | -2.00 | 2.67  | 0.07  |
| 411  | 1.61 | 1.96  | -0.34 | 0.05  |
| 412  | 1.12 | 0.07  | 1.05  | -0.28 |
| 413* | 0.89 | -1.26 | 2.15  | 0.07  |
| 414* | 0.84 | -2.10 | 2.94  | 0.07  |
| 415  | 1.28 | 0.01  | 1.26  | 0.06  |
| 416  | 1.33 | 1.07  | 0.26  | 0.07  |
| 191  | 0.74 | 0.10  | 0.63  | -1.24 |
| 417^ | 0.48 | -2.14 | 2.62  | 0.08  |
| 418  | 0.74 | 0.44  | 0.30  | 0.09  |
| 419  | 0.82 | -0.82 | 1.64  | 0.08  |
| 420  | 1.43 | 1.42  | 0.01  | 0.08  |
| 421  | 0.69 | -0.45 | 1.14  | 0.11  |
| 422  | 1.13 | -0.45 | 1.58  | 0.11  |
| 423  | 1.11 | 0.72  | 0.40  | 0.08  |
| 424  | 0.93 | -0.37 | 1.30  | 0.27  |
| 425  | 0.19 | -1.55 | 1.74  | 0.11  |
| 426  | 0.52 | 0.79  | -0.28 | 0.08  |
| 427  | 0.41 | -0.04 | 0.45  | 0.10  |
| 428  | 0.06 | -0.34 | 0.40  | 0.1   |
| 429  | 0.93 | 0.47  | 0.46  | 0.14  |
| 430  | 0.98 | -1.63 | 2.61  | 0.08  |

**Table S16.** Values predicted by the QSAR model of toxicity of the 68 naphthoquinone derivatives (prediction group).

| ID | Predicted activity | $h^{\text{lim}=0.3}$ |
|----|--------------------|----------------------|
| 1  | 0.55               | 0.14                 |
| 2  | 0.81               | 0.04                 |
| 3  | 0.74               | 0.04                 |
| 4  | 0.71               | 0.04                 |
| 5  | 0.43               | 0.16                 |
| 6  | 0.36               | 0.17                 |
| 7  | 0.33               | 0.17                 |
| 8  | 0.60               | 0.06                 |
| 9  | 0.62               | 0.06                 |
| 10 | 0.61               | 0.06                 |
| 11 | 1.02               | 0.03                 |
| 12 | 1.05               | 0.04                 |
| 13 | 1.03               | 0.04                 |
| 14 | 0.70               | 0.04                 |
| 15 | 0.78               | 0.03                 |
| 16 | 0.79               | 0.03                 |
| 17 | 1.11               | 0.10                 |
| 18 | 0.49               | 0.14                 |
| 19 | 0.54               | 0.14                 |
| 20 | 0.54               | 0.14                 |
| 21 | 0.43               | 0.14                 |
| 22 | 0.48               | 0.14                 |
| 23 | 0.48               | 0.14                 |
| 24 | 0.37               | 0.14                 |
| 25 | 0.41               | 0.14                 |
| 26 | 0.42               | 0.14                 |
| 27 | 0.42               | 0.14                 |
| 28 | 0.59               | 0.08                 |
| 29 | 0.51               | 0.08                 |
| 30 | 0.49               | 0.09                 |
| 31 | 0.41               | 0.12                 |
| 32 | 0.32               | 0.13                 |
| 33 | 0.28               | 0.13                 |
| 34 | 0.48               | 0.08                 |
| 35 | 0.50               | 0.08                 |
| 36 | 0.49               | 0.08                 |
| 37 | 0.59               | 0.10                 |
| 38 | 0.64               | 0.10                 |
| 39 | 0.63               | 0.09                 |

|    |      |      |
|----|------|------|
| 40 | 0.32 | 0.14 |
| 41 | 0.14 | 0.32 |
| 42 | 0.13 | 0.31 |
| 43 | 0.76 | 0.13 |
| 44 | 1.23 | 0.61 |
| 45 | 1.18 | 0.59 |
| 46 | 1.92 | 0.25 |
| 47 | 1.87 | 0.25 |
| 48 | 0.38 | 0.13 |
| 49 | 0.40 | 0.13 |
| 50 | 0.41 | 0.14 |
| 51 | 0.30 | 0.13 |
| 52 | 0.33 | 0.13 |
| 53 | 0.34 | 0.13 |
| 54 | 0.24 | 0.13 |
| 55 | 0.26 | 0.13 |
| 56 | 0.27 | 0.13 |
| 57 | 1.75 | 0.29 |
| 58 | 1.74 | 0.29 |
| 59 | 1.71 | 0.27 |
| 60 | 1.71 | 0.27 |
| 61 | 1.68 | 0.25 |
| 62 | 1.68 | 0.25 |
| 63 | 0.78 | 0.08 |
| 64 | 0.77 | 0.08 |
| 65 | 0.78 | 0.08 |
| 66 | 0.74 | 0.07 |
| 67 | 0.85 | 0.10 |
| 68 | 0.92 | 0.14 |

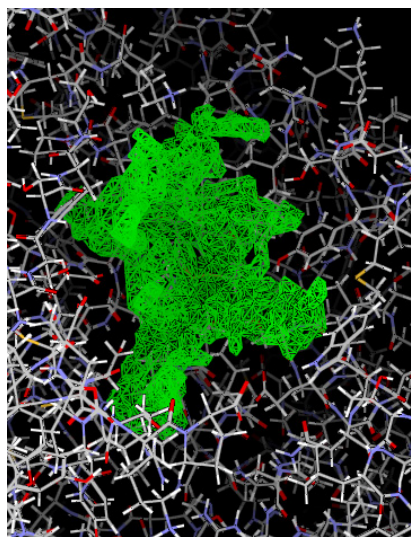

(a)

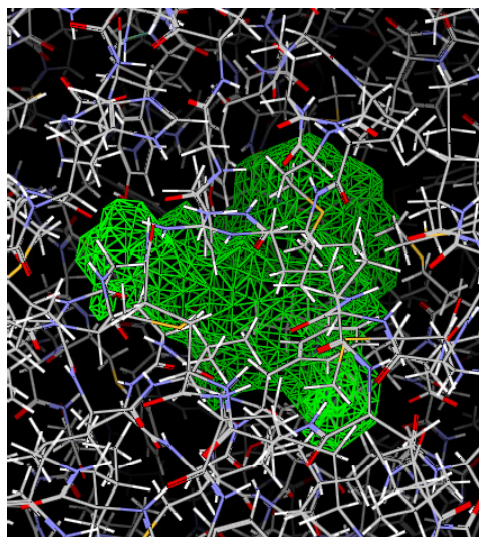

(b)

**Figure S1.** Cavities in the active site of *TcTR* (a) and *TcLαD* (b) proteins.

**Table S17.** Results of the coupling of naphthoquinone derivatives in the active site of the *TcTR* and *TcLaD* proteins.

| Ligand | <i>TcTR</i>          |                     |                 |       | <i>TcLaD</i>         |                     |                 |       |
|--------|----------------------|---------------------|-----------------|-------|----------------------|---------------------|-----------------|-------|
|        | Energy<br>(kcal/mol) | Hydrogen bonds (HB) |                 |       | Energy<br>(kcal/mol) | Hydrogen bonds (HB) |                 |       |
|        |                      | Residues            | Distance<br>(Å) | Force |                      | Residues            | Distance<br>(Å) | Force |
| 1      | -93.2095             | Lys 62 A            | 3.27            | -1.60 | -79.966              | -                   |                 |       |
|        |                      | Ser 464 B           | 2.78            | -2.50 |                      |                     |                 |       |
| 2      | -93.1213             | -                   |                 |       | -101.396             | Tyr 103 B           | 3.12            | -2.4  |
| 3      | -97.3813             | Lys 62 A            | 3.25            | -1.75 | -102.118             | -                   |                 |       |
|        |                      | Ser 464 B           | 2.69            | -2.50 |                      |                     |                 |       |
| 4      | -98.8420             | Lys 62 A            | 2.93            | -2.50 | -89.6888             | -                   |                 |       |
|        |                      | Ser 464 B           | 2.84            | -2.50 |                      |                     |                 |       |
|        |                      | Thr 463 B           | 3.35            | -1.15 |                      |                     |                 |       |
| 5      | -96.1777             | Asn 340 A           | 3.12            | -2.39 | -99.6799             | Tyr 103 B           | 3.34            | -1.31 |
| 6      | -108.0890            | Lys 62 A            | 2.94            | -2.50 | -113.434             | -                   |                 |       |
|        |                      | Ser 464 B           | 2.84            | -2.50 |                      |                     |                 |       |
|        |                      | Thr 463 B           | 3.32            | -1.31 |                      |                     |                 |       |
| 7      | -101.9060            | Lys 62 A            | 3.27            | -1.67 | -93.4699             | -                   |                 |       |
|        |                      | Ser 464 B           | 2.86            | -2.50 |                      |                     |                 |       |
| 8      | -91.5210             | Lys 62 A            | 2.95            | -2.05 | -80.5908             | -                   |                 |       |
|        |                      | Ser 464 B           | 2.60            | -2.39 |                      |                     |                 |       |
|        |                      | Thr 463 B           | 3.30            | -1.48 |                      |                     |                 |       |
| 9      | -96.9612             | Lys 62 A            | 2.94            | -2.50 | -89.3261             | -                   |                 |       |
|        |                      | Ser 464 B           | 2.84            | -2.50 |                      |                     |                 |       |
|        |                      | Thr 463 B           | 3.28            | -1.54 |                      |                     |                 |       |
| 10     | -94.0496             | Lys 62 A            | 3.28            | -1.58 | -86.8946             | -                   |                 |       |
|        |                      | Ser 464 B           | 2.78            | -2.50 |                      |                     |                 |       |
| 11     | -90.5348             | Ser 464 B           | 2.68            | -2.50 | -94.7798             | -                   |                 |       |
| 12     | -96.7141             | Lys 62 A            | 2.94            | -2.50 | -97.2161             | -                   |                 |       |
|        |                      | Ser 464 B           | 2.84            | -2.50 |                      |                     |                 |       |
|        |                      | Thr 463 B           | 3.30            | -1.43 |                      |                     |                 |       |
| 13     | -95.6654             | Lys 62 A            | 3.19            | -1.83 | -92.1773             | Tyr 116 B           | 2.77            | -2.50 |
|        |                      | Ser 464 B           | 2.82            | -2.50 |                      | Tyr 103 B           | 2.76            | -2.50 |
|        |                      | Thr 463 B           | 3.37            | -1.05 |                      |                     |                 |       |
| 14     | -103.9370            | Ser 464 B           | 2.48            | -1.54 | -108.916             | Tyr 116 B           | 3.03            | -2.5  |
| 15     | -100.7810            | Lys 62 A            | 3.20            | -1.90 | -109.628             | Tyr 116 B           | 3.18            | -2.08 |
|        |                      | Ser 464 B           | 2.83            | -2.50 |                      |                     |                 |       |
|        |                      | Thr 463 B           | 3.29            | -1.51 |                      |                     |                 |       |
| 16     | -90.6406             | Lys 62 A            | 2.78            | -0.94 | -90.6885             | Tyr 103 B           | 3.47            | -0.65 |
|        |                      |                     | 3.12            | -1.48 |                      |                     |                 |       |

|    |           |           |        |         |          |            |      |       |
|----|-----------|-----------|--------|---------|----------|------------|------|-------|
| 17 | -111.5950 | Ser 464 B | 2.99   | -0.70   | -96.9022 | -          |      |       |
|    |           | Leu 399 B | 2.48   | -1.48   |          |            |      |       |
| 18 | -88.1999  | Ser 464 B | 3.0700 | -2.4200 | -84.9483 | -          |      |       |
| 19 | -93.0333  | Lys 62 A  | 3.24   | -1.80   | -102.487 | -          |      |       |
|    |           | Ser 464 B | 2.80   | -2.50   |          |            |      |       |
| 20 | -87.2394  | -         |        |         | -88.8781 | -          |      |       |
| 21 | -102.4510 | Lys 62 A  | 3.37   | -1.04   | -90.7122 | -          |      |       |
|    |           | Ser 464 B | 2.72   | -2.50   |          |            |      |       |
| 22 | -101.7750 | Lys 62 A  | 3.13   | -2.37   | -94.9361 | Tyr 116 B  | 3.22 | -1.89 |
|    |           | Ser 464 B | 2.78   | -2.50   |          |            |      |       |
| 23 | -99.1009  | Lys 62 A  | 3.16   | -2.13   | -95.958  | Tyr 116 B  | 2.71 | -2.50 |
|    |           | Ser 464 B | 2.84   | -2.50   |          | Tyr 103 B  | 2.72 | -2.50 |
|    |           |           |        |         |          | HEM_1450 B | 0    | -0.21 |
| 24 | -102.5440 | Ser 464 B | 2.65   | -2.50   | -107.877 | -          |      |       |
| 25 | -97.5418  | Glu 467 B | 3.22   | -1.88   | -108.501 | -          |      |       |
| 26 | -100.7280 | Lys 62 A  | 2.93   | -2.50   | -98.0511 | Tyr 116 B  | 2.65 | -2.5  |
|    |           | Ser 464 B | 2.84   | -2.50   |          |            |      |       |
|    |           | Thr 463 B | 3.35   | -1.11   |          |            |      |       |
| 27 | -87.9757  | Lys 62 A  | 3.27   | -1.64   | -82.1982 | -          |      |       |
|    |           | Ser 464 B | 3.77   | -2.5    |          |            |      |       |
|    |           | Thr 463 B | 2.90   | -2.5    |          |            |      |       |
| 28 | -95.2882  | Lys 62 A  | 2.94   | -2.12   | -91.0531 | Tyr 103 B  | 3.08 | -1.82 |
|    |           | Ser 464 B | 2.58   | -2.32   |          |            |      |       |
|    |           | Thr 463 B | 3.22   | -1.83   |          |            |      |       |
| 29 | -100.6680 | Lys 62 A  | 2.98   | -2.5    | -95.5983 | -          |      |       |
|    |           | Ser 464 B | 2.83   | -2.5    |          |            |      |       |
|    |           | Thr 463 B | 3.25   | -1.27   |          |            |      |       |
| 30 | -98.5385  | Lys 62 A  | 3.12   | -1.27   | -90.1862 | HEM_1450 B | 0    | -2.5  |
|    |           | Ser 464 B | 2.57   | -2.22   |          |            |      |       |
|    |           | Thr 463 B | 3.19   | -1.79   |          |            |      |       |
| 31 | -91.1649  | Ser 464 B | 3.28   | -1.61   | -97.5895 | -          |      |       |
| 32 | -99.3677  | Gly 459 B | 3.11   | -2.33   | -107.973 | -          |      |       |
|    |           | Arg 355 A | 2.63   | -2.50   |          |            |      |       |
| 33 | -101.1350 | Lys 62 A  | 3.18   | -1.04   | -100.14  | Met 360 B  | 3.04 | -1.25 |
|    |           | Ser 464 B | 2.77   | -2.50   |          | HEM_1450 B | 0    | -2.5  |
|    |           | Thr 463 B | 3.30   | -1.02   |          |            |      |       |
| 34 | -90.2534  | Lys 62 A  | 3.43   | -0.76   | -85.9238 | -          |      |       |
|    |           | Ser 464 B | 2.78   | -2.50   |          |            |      |       |
| 35 | -95.1599  | Lys 62 A  | 3.03   | -2.25   | -96.4178 | -          |      |       |
|    |           | Ser 464 B | 2.79   | -2.50   |          |            |      |       |



|    |           |           |      |       |          |            |      |       |
|----|-----------|-----------|------|-------|----------|------------|------|-------|
|    |           | Thr 463 B | 3.22 | -1.42 |          |            |      |       |
| 36 | -92.4304  | Lys 62 A  | 3.27 | -1.67 | -87.0079 | HEM_1450 B | 0    | -2.48 |
|    |           | Ser 464 B | 2.62 | -2.50 |          |            |      |       |
| 37 | -89.9000  | Lys 62 A  | 3.39 | -0.93 | -90.2266 | -          |      |       |
|    |           | Ser 464 B | 2.85 | -2.50 |          |            |      |       |
| 38 | -91.8954  | Glu 466 B | 2.84 | -1.16 | -95.5077 | Met 360 B  | 3.18 | -0.99 |
|    |           |           | 3.34 | -1.30 |          | HEM_1450 B | 0    | -2.15 |
|    |           |           | 2.64 | -2.22 |          | Met 358 B  | 3.16 | -2.18 |
| 39 | -92.2933  | Ser 464 B | 2.59 | -2.38 | -86.5687 | Tyr 103 B  | 2.56 | -2.17 |
|    |           | Thr 463 B | 3.20 | -1.66 |          |            |      |       |
| 40 | -98.1876  | Arg 472 B | 2.67 | -2.50 | -79.3277 | Tyr 103 B  | 2.97 | -2.5  |
|    |           |           | 3.29 | -1.55 |          |            |      |       |
|    |           |           | 3.07 | -1.82 |          |            |      |       |
|    |           | Tyr 455 B | 2.99 | -1.53 |          |            |      |       |
|    |           | Thr 457 B | 2.71 | -0.75 |          |            |      |       |
| 41 | -98.3294  | Lys 62 A  | 2.97 | -2.50 | -105.707 | Tyr 116 B  | 3.13 | -2.37 |
|    |           | Ser 464 B | 2.84 | -2.50 |          |            |      |       |
|    |           | Thr 463 B | 3.26 | -1.24 |          |            |      |       |
| 42 | -99.5445  | Gly 459 B | 3.10 | -1.17 | -92.1493 | Tyr 116 B  | 2.92 | -2.50 |
|    |           | His 461 B | 2.57 | -1.18 |          | Met 358 B  | 3.39 | -1.03 |
|    |           |           |      |       |          | Tyr 103 B  | 3.11 | -1.09 |
|    |           |           |      |       |          |            | 2.79 | -2.50 |
| 43 | -110.8730 | Leu 399 B | 2.96 | -0.81 | -99.1137 | -          |      |       |
|    |           | Ser 464 B | 2.49 | -1.57 |          |            |      |       |
|    |           | Thr 463 B | 3.06 | -2.50 |          |            |      |       |
| 44 | -87.7661  | Gly 459 B | 2.66 | -2.15 | -99.1828 | Tyr 116 B  | 2.93 | -2.50 |
|    |           | Arg 472 B | 3.13 | -1.42 |          |            | 2.78 | -1.74 |
|    |           | Glu 466 B | 3.33 | -0.72 |          | Tyr 103 B  | 2.79 | -2.50 |
| 45 | -101.9210 | Ser 464 B | 2.56 | -2.20 | -96.7045 | -          |      |       |
|    |           | Thr 463 B | 3.96 | -0.70 |          |            |      |       |
| 46 | -100.4100 | Ser 464 B | 2.55 | -2.07 | -106.116 | -          |      |       |
|    |           | Lys 62 A  | 3.20 | -1.93 |          |            |      |       |
| 47 | -102.4440 | His 461 B | 2.60 | -1.56 | -100.698 | Tyr 103 B  | 2.65 | -2.5  |
| 48 | -84.4483  | Asn 340 A | 2.85 | -2.50 | -92.4174 | Tyr 116 B  | 3.11 | -2.47 |
|    |           | Thr 457 B | 2.72 | -2.50 |          | Tyr 103 B  | 2.70 | -2.50 |
|    |           | Ser 470 B | 3.21 | -0.98 |          |            | 2.48 | -1.81 |
| 49 | -91.8201  | Ser 464 B | 2.78 | -2.50 | -94.2563 | -          |      |       |
| 50 | -93.6531  | Thr 463 B | 3.26 | -1.71 | -84.7217 | Tyr 103 B  | 3.12 | -2.42 |
| 51 | -93.4097  | Ser 464 B | 2.50 | -1.70 | -96.9773 | Tyr 103 B  | 3.05 | -0.92 |

|    |           |           |              |                |          |            |      |       |
|----|-----------|-----------|--------------|----------------|----------|------------|------|-------|
| 52 | -99.7175  | Ser 464 B | 2.68         | -2.50          | -96.1798 | -          |      |       |
|    |           | Lys 62 A  | 3.19         | -1.35          |          |            |      |       |
| 53 | -89.8147  | Lys 62A   | 3.02         | -2.07          | -86.3019 | Tyr 103 B  | 2.83 | -2.5  |
|    |           | Ser 464 B | 2.56         | -2.2           |          |            |      |       |
| 54 | -91.1998  | Lys 62A   | 3            | -2.31          | -84.2155 | Tyr 103 B  | 2.98 | -2.5  |
|    |           | Ser 464 B | 2.63         | -2.5           |          |            |      |       |
| 55 | -90.4967  | Asn 340   | 2.97<br>3.02 | 2.5<br>-2.5    | -89.4427 | Tyr 103 B  | 3.03 | -2.5  |
| 56 | -92.4062  | Asn 340 A | 2.98         | -2.5           | -95.4859 | Tyr 103 B  | 2.69 | -2.34 |
|    |           | Gly 459 B | 2.82         | 2              |          |            |      |       |
| 57 | -79.6845  | Ser 464 B | 3.11         | -2.40          | -80.471  | Tyr 103 B  | 2.85 | -4.02 |
|    |           |           |              |                |          |            | 2.99 |       |
| 58 | -81.9298  | Arg 355 A | 2.45         | -0.97          | -82.6084 | Tyr 103 B  | 2.75 | -2.46 |
|    |           |           | 2.86         | -0.90          |          |            | 3.13 | -2.13 |
|    |           | Asn 340 A | 3.18         | -2.08          |          |            |      |       |
| 59 | -90.5529  | Lys 62 A  | 3.05         | -2.03          | -88.3182 | Tyr 103 B  | 2.84 | -2.5  |
|    |           | Ser 464 B | 2.55         | -2.12          |          |            | 3.08 | -2.5  |
| 60 | -91.8292  | Lys 62 A  | 2.96         | -2.21          | -90.6668 | Tyr 103 B  | 2.75 | -2.5  |
|    |           | Ser 464 B | 2.65         | -2.50          |          |            | 3.16 | -1.77 |
| 61 | -91.2961  | Asn 340A  | 3.14<br>2.84 | -0.81<br>-2.50 | -90.6484 | Tyr 103 B  | 2.9  | -2.5  |
| 62 | -94.5097  | Asn 340A  | 2.98<br>3.16 | -0.83<br>-2.21 | -92.0233 | Tyr 103 B  | 3.04 | -2.4  |
| 63 | -120.0300 | Ser 15 A  | 3.01         | 2.20           | -112.45  | HEM_1450 B | 0    | -2.06 |
|    |           |           |              |                |          | Tyr 103 B  | 3.05 | -0.71 |
|    |           |           |              |                |          |            | 3.08 | -2.5  |
|    |           |           |              |                |          |            | 2.58 | -1.39 |
| 64 | -128.7530 | Asn 340 A | 2.59         | -2.41          | -116.652 | HEM_1450 B | 0    | -2.21 |
|    |           | Gly 459 B | 2.64         | -2.50          |          | Tyr 103 B  | 2.77 | -1.46 |
|    |           | Arg 355 A | 3.02         | -2.06          |          |            | 3.12 | -2.41 |
| 65 | -122.4240 | Ser 15 A  | 3.08         | -2.50          | -114.785 | HEM_1450 B | 0    | -2.5  |
| 66 | -124.3250 | Ser 15 A  | 3.02         | -2.08          | -121.598 | Tyr 103 B  | 3.09 | -1.79 |
|    |           |           |              |                |          |            | 3.10 | -2.50 |
|    |           |           |              |                |          |            | 3.06 | -2.50 |
| 67 | -123.3630 | Ser 15 A  | 3.10         | -2.50          | -107.714 | -          |      |       |
| 68 | -123.5650 | Ser 15 A  | 3.11         | -2.45          | -121.185 | HEM_1450 B | 0    | -2.5  |

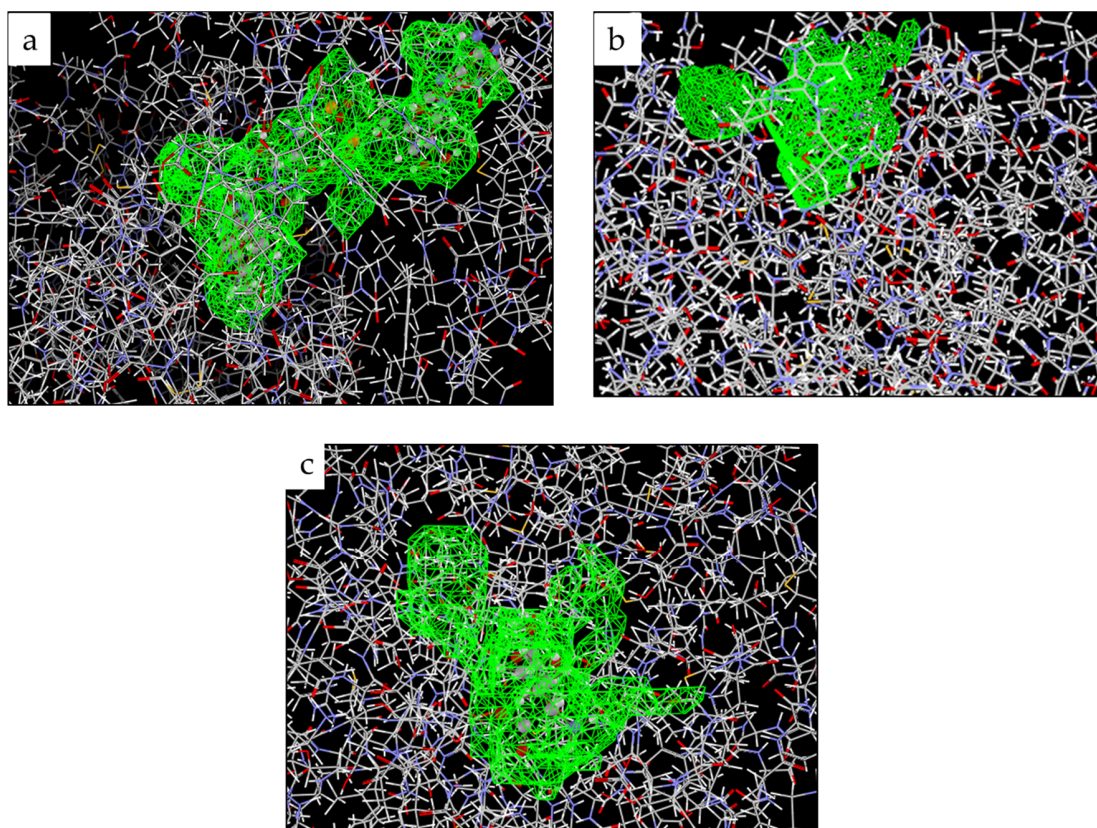

**Figure S2.** Cavities in the active site of LTR (a), *LaA* (b), and *LiTA* (c) proteins.



|    |          |        |      |       |    |          |         |      |       |
|----|----------|--------|------|-------|----|----------|---------|------|-------|
|    |          |        |      |       |    |          | Asp 327 | 3.53 | -0.02 |
| 8  | -100.768 | Lys 60 | 3.10 | -1.85 | 42 | -114.535 | Ser 14  | 3.04 | -1.51 |
|    |          |        |      |       |    |          | Gly 15  | 2.92 | -2.50 |
|    |          |        |      |       |    |          | Thr 335 | 3.35 | -0.22 |
|    |          |        |      |       |    |          |         | 3.07 | -1.82 |
|    |          |        |      |       |    |          |         | 3.08 | -2.50 |
|    |          |        |      |       |    |          | Asp 327 | 2.85 | -2.08 |
| 9  | -107.033 | Lys 60 | 2.65 | -0.84 | 43 | -101.908 | Thr 335 | 3.00 | -2.50 |
|    |          |        |      |       |    |          |         | 3.06 | -0.63 |
|    |          |        |      |       |    |          | Ser 162 | 2.54 | -0.94 |
|    |          |        |      |       |    |          |         | 3.50 | -0.15 |
|    |          |        |      |       |    |          | Arg 287 | 3.30 | -0.62 |
|    |          |        |      |       |    |          |         | 3.40 | -0.42 |
|    |          |        |      |       |    |          |         | 2.71 | -1.96 |
|    |          |        |      |       |    |          |         | 3.15 | -0.05 |
|    |          |        |      |       |    |          | Ser 14  | 3.03 | -2.11 |
|    |          |        |      |       |    |          |         | 2.80 | -2.50 |
|    |          |        |      |       |    |          | Lys 60  | 2.78 | -1.75 |
| 10 | -114.045 | Lys 60 | 3.08 | -1.99 | 44 | -112.801 | Arg 287 | 3.02 | -2.50 |
| 11 | -106.527 | Lys 60 | 2.51 | -0.61 | 45 | -93.208  | Thr 335 | 2.85 | -2.50 |
|    |          |        |      |       |    |          | Arg 287 | 3.10 | -2.48 |
|    |          |        |      |       |    |          | Asp 327 | 2.98 | -2.50 |
|    |          |        |      |       |    |          | Ser 162 | 2.97 | -2.50 |
|    |          |        |      |       |    |          |         | 2.89 | -2.50 |
|    |          |        |      |       |    |          |         | 2.75 | -2.50 |
| 12 | -112.686 | Lys 60 | 3.06 | -1.86 | 46 | -109.701 | Ser 14  | 2.73 | -2.50 |
|    |          |        |      |       |    |          | Ser 162 | 3.10 | -2.13 |
|    |          |        |      |       |    |          |         | 3.58 | -0.09 |
|    |          |        |      |       |    |          | Arg 287 | 3.05 | -2.15 |
|    |          |        |      |       |    |          | Thr 335 | 2.95 | -2.50 |
|    |          |        |      |       |    |          |         | 2.77 | -2.50 |
| 13 | -108.036 | Lys 60 | 2.62 | -0.87 | 47 | -114.397 | Ser 14  | 2.72 | -2.50 |
|    |          |        |      |       |    |          | Ser 162 | 3.16 | -2.21 |
|    |          |        |      |       |    |          |         | 3.22 | -1.89 |
|    |          |        |      |       |    |          | Arg 287 | 3.11 | -2.31 |
|    |          |        |      |       |    |          | Thr 335 | 3.32 | -1.38 |
|    |          |        |      |       |    |          |         | 3.08 | -2.29 |
| 14 | -111.703 | Lys 60 | 3.07 | -0.69 | 48 | -93.423  | Lys 60  | 2.85 | -1.49 |
|    |          |        | 2.64 | -0.98 |    |          |         |      |       |
| 15 | -121.911 | Ser 14 | 3.28 | -1.45 | 49 | -106.004 | Lys 60  | 3.43 | -0.62 |

|    |          |         |      |       |    |          |         |      |       |
|----|----------|---------|------|-------|----|----------|---------|------|-------|
|    |          |         | 3.06 | -2.50 |    |          |         |      |       |
|    |          | Thr 51  | 3.03 | -0.59 |    |          |         |      |       |
|    |          | Cys 52  | 2.84 | -2.50 |    |          |         |      |       |
|    |          | Lys 60  | 3.37 | -1.04 |    |          |         |      |       |
| 16 | -116.118 | Lys 60  | 2.75 | -1.72 | 50 | -107.717 | Arg 287 | 2.97 | -2.50 |
|    |          | Thr 51  | 2.86 | -2.50 |    |          |         |      |       |
|    |          | Thr 335 | 2.85 | -1.46 |    |          |         |      |       |
|    |          |         | 3.04 | 2.50  |    |          |         |      |       |
| 17 | -127.261 | Ser 14  | 3.21 | -1.93 | 51 | -109.342 | Lys 60  | 3.60 | -0.01 |
|    |          | Thr 335 | 2.92 | -2.50 |    |          | Arg 287 | 3.14 | -2.31 |
|    |          |         | 2.96 | -1.77 |    |          |         |      |       |
|    |          |         | 3.59 | -0.07 |    |          |         |      |       |
|    |          | Lys 60  | 2.62 | -0.99 |    |          |         |      |       |
|    |          | Ser 162 | 3.02 | -2.31 |    |          |         |      |       |
|    |          |         | 3.42 | -0.92 |    |          |         |      |       |
|    |          | Arg 287 | 2.90 | -2.25 |    |          |         |      |       |
| 18 | -96.817  | Lys 60  | 2.61 | -2.50 | 52 | -109.544 | Arg 287 | 2.91 | -2.50 |
| 19 | -113.030 | Lys 60  | 3.06 | -2.50 | 54 | -114.265 | Thr 51  | 2.74 | -2.40 |
|    |          |         |      |       |    |          |         | 3.18 | -1.22 |
|    |          |         |      |       |    |          | Thr 335 | 2.93 | -2.50 |
|    |          |         |      |       |    |          |         | 3.08 | -1.56 |
| 20 | -114.556 | Lys 60  | 3.03 | -2.50 | 54 | -118.580 | Cys 52  | 3.07 | -0.90 |
|    |          |         |      |       |    |          | Thr 51  | 2.60 | -1.74 |
|    |          |         |      |       |    |          |         | 3.30 | -1.51 |
|    |          |         |      |       |    |          | Cys 52  | 3.55 | -0.24 |
| 21 | -104.131 | Lys 60  | 2.69 | -2.50 | 55 | -118.004 | Cys 57  | 3.00 | -0.64 |
|    |          |         |      |       |    |          | Thr 335 | 3.13 | -2.36 |
|    |          |         |      |       |    |          | Lys 60  | 2.98 | -1.25 |
|    |          |         |      |       |    |          | Try 198 | 3.49 | -0.53 |
| 22 | -111.561 | Lys 60  | 3.16 | -2.19 | 56 | -125.794 | Thr 335 | 2.77 | -1.76 |
|    |          |         |      |       |    |          |         | 3.04 | -2.50 |
|    |          |         |      |       |    |          | Thr 51  | 3.40 | -0.57 |
|    |          |         |      |       |    |          |         | 2.69 | -1.91 |
| 23 | -118.762 | Lys 60  | 3.02 | -1.85 | 57 | -102.122 | Cys 52  | 3.14 | -0.98 |
|    |          |         |      |       |    |          | Thr 335 | 3.12 | -2.42 |
|    |          |         |      |       |    |          | Cys 57  | 3.00 | -0.64 |
|    |          |         |      |       |    |          | Lys 60  | 2.69 | -1.36 |
| 24 | -118.061 | Ser 14  | 2.97 | -2.50 | 58 | -102.453 | Lys 60  | 3.10 | -2.08 |
|    |          | Thr 335 | 2.21 | 0.76  |    |          |         | 2.90 | -1.53 |
|    |          |         |      |       |    |          |         |      |       |

|    |          |         |      |       |    |          |         |      |       |
|----|----------|---------|------|-------|----|----------|---------|------|-------|
|    |          |         | 3.18 | -2.11 |    |          |         |      |       |
|    |          | Ser 162 | 3.17 | -1.77 |    |          |         | 2.80 | -1.98 |
|    |          | Arg 287 | 3.05 | -2.04 |    |          |         |      |       |
| 25 | -116.771 | Lys 60  | 3.57 | -0.13 | 59 | -105.655 | Lys 60  | 2.36 | -0.47 |
|    |          |         |      |       |    |          | Try 198 | 3.46 | -0.39 |
| 26 | -118.707 | Lys 60  | 3.08 | -2.00 | 60 | -107.908 | Lys 60  | 2.79 | -1.82 |
|    |          |         |      |       |    |          |         | 2.65 | -1.77 |
| 27 | -94.284  | Lys 60  | 2.71 | -0.51 | 61 | -112.204 | Thr 335 | 3.07 | -2.50 |
|    |          |         |      |       |    |          |         | 2.96 | -1.03 |
|    |          |         |      |       |    |          | Lys 60  | 2.37 | -0.44 |
|    |          |         |      |       |    |          | Tyr 198 | 3.57 | -0.16 |
| 28 | -107.867 | Ser 14  | 2.57 | -2.23 | 62 | -121.668 | Thr 335 | 3.15 | -2.25 |
|    |          | Thr 335 | 2.57 | -1.89 |    |          | Thr 51  | 3.19 | 1.07  |
|    |          |         | 3.11 | -1.90 |    |          |         | 2.63 | -1.85 |
|    |          |         | 2.97 | -2.50 |    |          |         |      |       |
|    |          | Arg 287 | 3.07 | -2.16 |    |          | Cys 52  | 3.24 | -0.71 |
|    |          | Ser 162 | 3.60 | 0     |    |          |         |      |       |
|    |          |         | 3.08 | -2.08 |    |          |         |      |       |
| 29 | -113.613 | Ser 14  | 2.88 | -2.50 | 63 | -145.502 | Lys 60  | 2.80 | -2.06 |
|    |          | Cys 52  | 3.16 | -2.19 |    |          | Cys 52  | 3.10 | -1.07 |
|    |          |         |      |       |    |          |         | 3.34 | -1.18 |
|    |          | Lys 60  | 3.51 | -0.44 |    |          | Thr 335 | 3.50 | -0.19 |
| 30 | -108.388 | Ser 14  | 2.57 | -2.27 | 64 | -155.221 | Lys 60  | 2.53 | -1.26 |
|    |          | Tyr 198 | 3.45 | -0.76 |    |          | Cys 52  | 3.09 | -0.83 |
|    |          | Lys 60  | 3.37 | -0.49 |    |          |         | 3.23 | -1.53 |
|    |          | Thr 335 | 2.57 | -1.87 |    |          | Thr 335 | 3.24 | -0.54 |
|    |          |         | 2.97 | -2.50 |    |          |         |      |       |
|    |          | Arg 287 | 3.05 | -2.13 |    |          | Ser 14  | 3.54 | -0.30 |
|    |          | Ser 162 | 3.11 | -2.07 |    |          |         |      |       |
| 31 | -115.255 | Ser 14  | 2.57 | -2.22 | 65 | -158.024 | Lys 60  | 3.02 | -2.26 |
|    |          | Thr 335 | 2.57 | -1.88 |    |          | Cys 52  | 3.08 | -2.37 |
|    |          |         | 3.09 | -1.91 |    |          |         | 3.03 | -1.04 |
|    |          |         | 2.97 | -2.50 |    |          | Thr 335 | 3.14 | -0.69 |
|    |          | Arg 287 | 3.07 | -2.15 |    |          | Ser 14  | 3.35 | -1.27 |
|    |          | Ser 162 | 3.09 | -2.09 |    |          |         |      |       |
| 32 | -115.011 | Ser 14  | 3.45 | -0.73 | 66 | -147.809 | Lys 60  | 2.18 | -1.93 |
|    |          | Cys 52  | 3.08 | -2.50 |    |          | Cys 52  | 3.11 | -1.13 |
|    |          |         |      |       |    |          |         | 3.39 | -1.03 |
|    |          |         |      |       |    |          | Thr 335 | 3.19 | -0.72 |
|    |          |         |      |       |    |          | Ser 14  | 3.37 | -1.15 |
| 33 | -118.296 | Ser 14  | 2.56 | -2.19 | 67 | -143.973 | Lys 60  | 3.51 | -0.33 |
|    |          | Thr 198 | 3.22 | -1.90 |    |          | Thr 335 | 3.07 | -1.09 |

|           |         |         |      |       |           |          |        |      |       |
|-----------|---------|---------|------|-------|-----------|----------|--------|------|-------|
|           |         | Thr 335 | 3.10 | -2.50 |           |          |        | 3.44 | -0.11 |
|           |         |         | 3.18 | -2.09 |           |          |        | 3.07 | -0.14 |
|           |         | Arg 287 | 3.19 | -2.06 |           |          | Cys 52 | 2.98 | -0.81 |
|           |         | Ser 162 | 3.11 | -2.44 |           |          |        |      |       |
|           |         |         | 3.09 | -2.50 |           |          |        |      |       |
| <b>34</b> | -95.239 | Thr 335 | 3.04 | -0.34 | <b>68</b> | -151.683 | Lys 60 | 2.59 | -1.68 |
|           |         |         | 2.96 | -1.89 |           |          |        |      |       |
|           |         |         | 3.01 | -0.99 |           |          | Cys 52 | 3.38 | -0.42 |
|           |         |         |      |       |           |          |        |      |       |



**Table S19.** Results of the docking of naphthoquinone derivatives in the active site of the *LaA* protein.

| ID | Energy<br>(kcal/mol) | Hydrogen Bond (HB) |                 |       | ID | Energy<br>(kcal/mol) | Hydrogen Bond (HB) |                 |                |  |  |
|----|----------------------|--------------------|-----------------|-------|----|----------------------|--------------------|-----------------|----------------|--|--|
|    |                      | Residues           | Distance<br>(Å) | Force |    |                      | Residues           | Distance<br>(Å) | Force          |  |  |
| 1  | -81.600              | Val 149            | 3.10            | -2.42 | 35 | -90.191              | Val 149            | 2.74            | -1.80          |  |  |
|    |                      | Thr 148            | 2.98            | -2.50 |    |                      | Ser 150            | 3.10            | -1.06          |  |  |
|    |                      | Ser 150            | 3.48            | -0.12 |    |                      | Asn 152            | 3.26            | -1.53          |  |  |
|    |                      |                    |                 |       |    |                      | Thr 148            | 2.60<br>3.10    | -2.49<br>-2.49 |  |  |
| 2  | -83.661              | -                  | -               | -     | 36 | -89.049              | Val 149            | 3.18            | -1.63          |  |  |
|    |                      |                    |                 |       |    |                      | Asn 152            | 3.12            | -1.76          |  |  |
|    |                      |                    |                 |       |    |                      | Thr 148            | 2.60<br>3.39    | -2.50<br>-0.96 |  |  |
|    |                      |                    |                 |       |    |                      |                    |                 |                |  |  |
| 3  | -90.616              | -                  | -               | -     | 37 | -82.695              | Asp 194            | 2.63            | -2.50          |  |  |
| 4  | -99.235              | Thr 257            | 3.00            | -2.50 | 38 | -88.696              | Asp 194            | 2.60            | -1.65          |  |  |
|    |                      | Thr 148            | 2.60            | -2.21 |    |                      | Glu 197            | 3.15            | -1.61          |  |  |
|    |                      | Val 149            | 3.21            | -1.12 |    |                      | Asp 141            | 3.04            | -1.88          |  |  |
|    |                      | Ser 150            | 2.94            | -2.46 |    |                      |                    |                 |                |  |  |
| 5  | -100.881             | His 154            | 3.11            | -1.85 | 39 | -82.015              | Ala 140            | 3.45            | -0.30          |  |  |
|    |                      |                    |                 |       |    |                      | Asp 141            | 3.20            | -2.01          |  |  |
|    |                      |                    |                 |       |    |                      | Ala 192            | 2.60            | -0.66          |  |  |
|    |                      |                    |                 |       |    |                      | Glu 197            | 2.58            | -0.66          |  |  |
|    |                      |                    |                 |       |    |                      | Asp 194            | 2.72            | -2.50          |  |  |
| 6  | -102.105             | -                  | -               | -     | 40 | -105.329             | Ser 150            | 3.27            | -1.66          |  |  |
|    |                      |                    |                 |       |    |                      |                    | 3.48            | -0.60          |  |  |
|    |                      |                    |                 |       |    |                      |                    | 2.82            | -1.36          |  |  |
|    |                      |                    |                 |       |    |                      |                    | 2.60            | -2.50          |  |  |
|    |                      |                    |                 |       |    |                      |                    | 2.60            | -2.43          |  |  |
|    |                      |                    |                 |       |    |                      | Thr 148            | 3.43            | -0.85          |  |  |
|    |                      |                    |                 |       |    |                      |                    | 2.41            | -0.84          |  |  |
|    |                      |                    |                 |       |    |                      | Asn 143            | 3.32            | -0.03          |  |  |
|    |                      |                    |                 |       |    |                      |                    | 2.87            | -0.10          |  |  |
|    |                      |                    |                 |       |    |                      | Val 149            | 2.89            | -2.50          |  |  |
|    |                      |                    |                 |       |    |                      | Asp 194            | 2.60            | -1.25          |  |  |
|    |                      |                    |                 |       |    |                      | Asp 141            | 3.33            | -0.99          |  |  |
| 7  | -100.978             | Thr 148            | 3.14            | -2.29 | 41 | -108.543             | Val 149            | 3.08            | -2.39          |  |  |
|    |                      |                    |                 |       |    |                      |                    | 2.60            | -2.50          |  |  |
|    |                      | Asn 143            | 2.60            | -2.50 |    |                      | Ser 150            | 3.36            | -1.20          |  |  |
|    |                      |                    |                 |       |    |                      |                    | 3.29            | -1.53          |  |  |
|    |                      |                    |                 |       |    |                      |                    | 2.60            | -2.50          |  |  |
|    |                      | Ser 150            | 2.56            | -1.97 |    |                      | Thr 148            | 3.27            | -1.67          |  |  |
|    |                      |                    |                 |       |    |                      |                    | 2.34            | -0.30          |  |  |
|    |                      |                    |                 |       |    |                      | Glu 197            | 3.10            | -1.67          |  |  |
|    |                      |                    |                 |       |    |                      | Asp 194            | 2.65            | -0.24          |  |  |
|    | 3.27                 | -0.25              |                 |       |    |                      |                    |                 |                |  |  |

|         |          |         |         |       |       |          |         |       |       |
|---------|----------|---------|---------|-------|-------|----------|---------|-------|-------|
|         |          |         |         |       |       |          | Asp 141 | 3.07  | -1.72 |
| 8       | -83.514  | Ser 150 | 3.10    | -2.50 | 42    | -94.784  | Thr 257 | 3.32  | -1.38 |
|         |          |         | 2.58    | -1.67 |       |          | Ser 150 | 3.00  | -0.68 |
|         |          | Val 149 | 3.39    | -0.77 |       |          | Thr 148 | 2.77  | -2.50 |
|         |          |         |         |       |       |          | 3.27    | -0.85 |       |
|         |          | Thr 148 | 3.12    | -2.40 |       |          | Asn 152 | 3.35  | -0.70 |
|         |          |         |         |       |       |          | Val 149 | 3.10  | -2.18 |
| 9       | -89.104  | Thr 148 | 3.01    | -2.50 | 43    | -111.305 | Ser 150 | 2.96  | -2.21 |
|         |          |         |         |       |       |          |         | 2.60  | -2.30 |
|         |          |         |         |       |       |          |         | 2.60  | -2.50 |
|         |          |         |         |       |       |          |         | 3.29  | -1.57 |
|         |          |         |         |       |       |          |         | 3.47  | -0.65 |
|         |          | Asn 143 | 2.61    | -2.49 |       |          | Gly 151 | 3.55  | -0.22 |
|         |          |         |         |       |       |          | Thr 148 | 3.34  | -1.29 |
|         |          |         |         |       |       |          |         | 2.31  | -0.10 |
|         |          |         |         |       |       |          | Val 149 | 2.87  | -2.50 |
|         |          |         |         |       |       |          | Asp 194 | 2.91  | -1.10 |
| Val 149 | 3.22     | -1.81   | Asp 141 | 3.10  | -1.60 |          |         |       |       |
| 10      | -85.563  | Ser 150 | 2.86    | -1.68 | 44    | -75.88   | Ser 150 | 3.39  | -1.07 |
|         |          | Asp 141 | 3.14    | -1.47 |       |          | Val 149 | 2.87  | -2.5  |
|         |          |         |         |       |       |          | Asn 143 | 3.1   | -2.5  |
|         |          |         |         |       |       |          |         | 3.1   | -2.5  |
|         |          |         |         |       |       |          |         | 3.2   | -1.98 |
| 11      | -81.801  | -       | -       | -     | 45    | -86.191  | Asn 143 | 2.86  | -2.01 |
| 12      | -85.155  | Asn 143 | 2.86    | -0.50 | 46    | -81.159  | Asn 152 | 3.19  | -0.92 |
|         |          | Thr 148 | 2.91    | -2.50 |       |          |         |       |       |
| 13      | -89.131  | Thr 148 | 2.90    | -2.33 | 47    | -85.875  | Thr 148 | 3.36  | -1.22 |
|         |          |         |         |       |       |          | Asn 143 | 2.7   | -1.08 |
|         |          |         |         |       |       |          | Thr 257 | 3.04  | -2.5  |
| 14      | -101.370 | Ser 150 | 2.95    | -1.51 | 48    | -94.363  | Val 149 | 2.63  | -2.50 |
|         |          |         | 3.30    | -1.48 |       |          | Ser 150 | 3.03  | -1.00 |
|         |          |         | 3.38    | -1.12 |       |          |         |       |       |
|         |          |         | 2.62    | -2.26 |       |          |         |       |       |
|         |          |         | 2.51    | -1.79 |       |          |         |       |       |
|         |          | Thr 148 | 3.30    | -1.51 |       |          | Thr 148 | 3.11  | -2.46 |
|         |          |         |         |       |       |          |         |       |       |
|         |          | Gly 151 | 3.52    | -0.34 |       |          |         |       |       |
|         |          | Val 149 | 2.96    | -2.44 |       |          |         |       |       |
|         |          | Asp 141 | 3.11    | -1.58 |       |          |         |       |       |

|         |          |         |      |       |       |         |         |       |        |  |  |
|---------|----------|---------|------|-------|-------|---------|---------|-------|--------|--|--|
| 15      | -91.161  | Thr 257 | 3.10 | -2.50 | 49    | -86.276 | Asp 141 | 3.10  | -2.49  |  |  |
|         |          |         |      |       |       |         | Ala 140 | 3.48  | -0.22  |  |  |
|         |          |         |      |       |       |         | Glu 197 | 2.44  | -0.59  |  |  |
|         |          |         |      |       |       |         | Asp 194 | 2.65  | -0.33  |  |  |
| 16      | -91.305  | Asn 143 | 2.60 | -0.34 | 50    | -96.301 | Asp 194 | 3.56  | -0.001 |  |  |
|         |          | Thr 148 | 3.08 | -2.50 |       |         |         | 3.58  | -0.01  |  |  |
|         |          | Thr 257 | 2.90 | -2.50 |       |         |         | 2.60  | -2.50  |  |  |
|         |          | Ser 150 | 2.46 | -1.09 |       |         | Ala 192 | 3.10  | -2.50  |  |  |
| 17      | -105.910 | Asn 143 | 3.20 | -0.23 | 51    | -90.319 | His 139 | 3.14  | -2.29  |  |  |
|         |          |         | 3.11 | -1.20 |       |         |         |       |        |  |  |
|         |          | Ser 150 | 3.02 | -2.50 |       |         |         |       |        |  |  |
|         |          | His 139 | 2.73 | -0.02 |       |         |         |       |        |  |  |
|         |          | Thr 257 | 3.10 | -2.39 |       |         |         |       |        |  |  |
| 18      | -85.587  | Thr 143 | 3.06 | -2.50 | 52    | -96.058 | Thr 148 | 2.97  | -2.50  |  |  |
|         |          |         |      | 3.11  |       |         |         | -2.06 |        |  |  |
|         |          | Val 149 | 3.09 | -2.50 |       |         | Asn 152 | 3.53  | -0.34  |  |  |
|         |          | Ser 150 | 2.60 | -2.47 |       |         | Val 149 | 2.97  | -2.48  |  |  |
| Ser 150 | 2.60     |         |      |       | -2.50 |         |         |       |        |  |  |
|         |          |         |      |       |       | Asn 143 | 2.68    | -2.50 |        |  |  |
| 19      | -85.055  | -       | -    | -     | 53    | -83.897 | Asp 141 | 3.05  | -1.82  |  |  |
|         |          |         |      |       |       |         | Glu 197 | 3.13  | -0.47  |  |  |
|         |          |         |      |       |       |         | Asp 194 | 2.6   | -1.41  |  |  |
| 20      | -82.806  | -       | -    | -     | 54    | -89.613 | Thr 148 | 2.6   | -2.06  |  |  |
|         |          |         |      |       |       |         | Asn 152 | 2.78  | -1.58  |  |  |
|         |          |         |      |       |       |         | Ser 150 | 3.35  | -0.08  |  |  |
| 21      | -84.880  | -       | -    | -     | 55    | -87.163 | Thr 148 | 2.6   | -2.5   |  |  |
|         |          |         |      |       |       |         | Asn 143 | 2.6   | -0.16  |  |  |
|         |          |         |      |       |       |         | Asn 152 | 2.86  | -0.03  |  |  |
|         |          |         |      |       |       |         | His 154 | 3.5   | -0.19  |  |  |
| 22      | -92.461  | -       | -    | -     | 56    | -94.045 | Thr 148 | 2.98  | -2.1   |  |  |
|         |          |         |      |       |       |         | His 154 | 3.46  | -0.71  |  |  |
|         |          |         |      |       |       |         | Asn 152 | 3.2   | -2.01  |  |  |
| 23      | -84.315  | Asn 143 | 3.10 | -2.44 | 57    | -67.630 | Ser 150 | 3.13  | -2.27  |  |  |
|         |          | Ser 150 | 2.41 | -0.04 |       |         | Asn 143 | 3.35  | -0.57  |  |  |
| 24      | -97.226  | Asn 143 | 3.22 | -1.58 | 58    | -86.668 | Asn 143 | 2.94  | -1.58  |  |  |
| 25      | -89.138  | -       | -    | -     | 59    | -71.623 | Asn 152 | 3.24  | -1.42  |  |  |
|         |          |         |      |       |       |         | Ser 150 | 3.25  | -0.53  |  |  |
|         |          |         |      |       |       |         |         | 2.82  | -2.50  |  |  |
|         |          |         |      |       |       |         | Thr 257 | 3.46  | -0.67  |  |  |
| 26      | -99.623  | Ser 150 | 3.12 | -2.38 | 60    | -76.008 | Asn 143 | 2.88  | -0.54  |  |  |
|         |          |         | 2.41 | -0.71 |       |         |         |       |        |  |  |
|         |          | Val 149 | 3.47 | -0.42 |       |         |         |       |        |  |  |
|         |          | Thr 148 | 2.94 | -2.29 |       |         |         |       |        |  |  |
| 27      | -85.381  | Asp 141 | 3.09 | -2.03 | 61    | -71.498 | Val 149 | 2.64  | -2.40  |  |  |
|         |          | Glu 197 | 3.36 | -1.03 |       |         | Thr 148 | 3.34  | -1.29  |  |  |

|         |         |         |         |         |         |          |         |       |       |
|---------|---------|---------|---------|---------|---------|----------|---------|-------|-------|
|         |         |         |         |         |         |          | Asn 143 | 2.71  | -0.07 |
|         |         |         |         |         |         |          | Ser 150 | 3.20  | -2.02 |
|         |         |         |         |         |         |          |         | 3.44  | -0.35 |
| 28      | -87.716 | Asp 141 | 3.07    | -1.72   | 62      | -83.099  | Thr 148 | 3.47  | -0.63 |
|         |         | Glu 197 | 3.14    | -0.92   |         |          | Asn 143 | 3.10  | -0.84 |
|         |         | Asp 194 | 2.60    | -2.42   |         |          |         |       |       |
| 29      | -99.351 | Val 149 | 3.00    | -1.95   | 63      | -104.823 | Asn 143 | 3.10  | -0.81 |
|         |         | Thr 148 | 2.74    | -2.50   |         |          | Ser 150 | 3.33  | -0.11 |
|         |         |         |         |         |         |          |         | 3.11  | -2.21 |
|         |         |         |         |         |         |          |         | 3.20  | -2.01 |
|         |         | 3.01    | -2.50   |         |         |          |         |       |       |
|         |         | Ser 150 | 3.29    | -1.53   |         |          | Thr 148 | 2.90  | -1.68 |
|         |         |         |         |         |         |          |         | 2.33  | -0.14 |
|         |         | Asp 141 | 3.05    | -1.74   |         |          | Val 149 | 2.62  | -2.50 |
|         |         | Glu 197 | 3.07    | -1.19   |         |          |         |       |       |
|         |         | Asp 194 | 2.65    | -2.49   |         |          |         |       |       |
| 30      | -88.975 | Asn 143 | 2.60    | -0.23   | 64      | -116.708 | Ser 150 | 2.60  | -1.12 |
|         |         | Thr 148 | 3.00    | -2.50   |         |          |         | 3.24  | -1.63 |
|         |         |         |         |         |         |          |         | 3.39  | -1.03 |
|         |         |         |         |         |         |          |         | 2.86  | -2.50 |
|         |         |         |         |         |         |          | 3.39    | -0.52 |       |
|         |         | Ser 150 | 2.40    | -0.56   |         |          | Thr 148 | 3.14  | -0.15 |
|         |         |         |         |         |         |          |         | 3.05  | -0.11 |
|         |         | Val 149 | 2.60    | -2.50   |         |          |         |       |       |
|         |         |         | 2.60    | -1.41   |         |          |         |       |       |
|         |         | 31      | -90.099 | Asp 194 |         |          | 2.90    | -2.50 | 65    |
| Ala 192 | 3.10    |         |         | -2.48   | Thr 148 | 3.33     | -0.14   |       |       |
|         |         |         |         |         |         | 2.79     | -2.50   |       |       |
|         |         |         |         |         | 2.09    | 1.81     |         |       |       |
|         |         |         |         |         | Asn 143 | 3.48     | -0.07   |       |       |
| 3.10    | -0.38   |         |         |         |         |          |         |       |       |
| Val 149 | 2.67    |         |         | -2.02   |         |          |         |       |       |
|         | 3.40    |         |         | -0.54   |         |          |         |       |       |
| Ser 150 | 3.10    |         |         | -2.50   |         |          |         |       |       |
|         | 3.10    |         |         | -2.50   |         |          |         |       |       |
|         | 3.53    | -0.36   |         |         |         |          |         |       |       |
| 32      | -10.517 | Thr 257 | 3.44    | -0.80   | 66      | -121.516 | Asn 152 | 3.08  | -2.50 |
|         |         | Ser 150 | 3.53    | -0.01   |         |          | Thr 148 | 3.10  | -0.43 |
|         |         |         |         |         |         |          |         | 1.99  | 2.74  |
|         |         |         |         |         |         |          |         | 3.52  | -0.38 |
|         |         | 2.54    | -1.95   |         |         |          |         |       |       |
| Thr 148 | 3.10    | -2.50   | Val 149 | 3.15    | -0.15   |          |         |       |       |

|         |         |         |         |         |         |          |         |         |       |          |
|---------|---------|---------|---------|---------|---------|----------|---------|---------|-------|----------|
|         |         |         |         |         |         |          |         |         | 2.61  | -1.18    |
|         |         |         |         |         |         |          |         | 3.34    | -1.31 |          |
|         |         |         | 2.90    | -1.66   |         |          |         | Ser 150 | 2.80  | -2.50    |
|         |         |         |         |         |         |          |         |         | 3.10  | -1.51    |
|         |         |         |         |         |         |          |         |         | 2.16  | 1.26     |
|         |         | 2.49    |         |         |         |          | -1.57   |         |       |          |
| Val 149 | 2.60    | -2.49   | Gly 151 | 3.22    | -1.32   |          |         |         |       |          |
| 33      | -10.459 | Val 149 | 2.63    | -2.50   | 67      | -115.454 | Ser 150 | 3.36    | -1.20 |          |
|         |         |         |         |         |         |          |         | 3.04    | -2.15 |          |
|         |         |         |         |         |         |          |         | 3.10    | -2.50 |          |
|         |         |         |         |         |         |          |         | 2.81    | -1.15 |          |
|         |         | Ser 150 | 2.88    | -1.71   |         |          | Thr 148 | 2.66    | -2.50 |          |
|         |         |         |         |         |         |          |         | 2.46    | -0.80 |          |
|         |         | Thr 148 | 2.87    | -1.22   |         |          | Asn 143 | 3.32    | -0.11 |          |
|         |         |         |         |         |         |          |         | 3.16    | -0.87 |          |
|         |         | Val 149 | 3.10    | -1.85   |         |          |         |         |       |          |
|         |         | 34      | -82.222 | Thr 148 |         |          | 2.99    | -2.17   | 68    | -112.983 |
| His 154 | 3.29    |         |         | -1.53   | Thr 148 | 2.60     | -2.50   |         |       |          |
| Asn 152 | 3.10    |         |         | -2.50   | Asn 152 | 3.42     | -0.87   |         |       |          |
|         |         |         |         |         |         | 2.50     | -1.65   |         |       |          |
|         |         |         |         |         |         | 2.97     | -2.50   |         |       |          |
|         |         |         |         |         | Ser 150 | 3.01     | -2.50   |         |       |          |
| 2.89    | -2.50   |         |         |         |         |          |         |         |       |          |
| 3.52    | -0.39   |         |         |         |         |          |         |         |       |          |

**Table S20.** Results of the docking of naphthoquinone derivatives in the active site of the *LiTA* protein.

| ID | Energy<br>(kcal/mol) | Hydrogen bond (HB) |              |       | ID | Energy<br>(kcal/mol) | Hydrogen bond (HB) |              |       |
|----|----------------------|--------------------|--------------|-------|----|----------------------|--------------------|--------------|-------|
|    |                      | Residues           | Distance (Å) | Force |    |                      | Residues           | Distance (Å) | Force |
| 1  | -79.606              | Tyr 256            | 2.96         | -2.50 | 35 | -82.252              | Tyr 256            | 2.18         | 1.05  |
|    |                      |                    | 2.79         | -0.74 |    |                      | Asn 225            | 3.10         | -2.29 |
| 2  | -85.849              | Asn 225            | 2.90         | -1.44 | 36 | -80.826              | Tyr 256            | 3.01         | -2.50 |
|    |                      | Gly 79             | 3.46         | -0.39 |    |                      |                    | 2.95         | -2.50 |
| 3  | -86.939              | Tyr 256            | 3.00         | -1.42 | 37 | -82.337              | Tyr 256            | 2.93         | -2.50 |
|    |                      |                    |              |       |    |                      |                    | 2.86         | -2.50 |
| 4  | -87.891              | Tyr 256            | 3.03         | -2.50 | 38 | -81.804              | Tyr 256            | 2.73         | -2.50 |
|    |                      |                    | 3.02         | -2.50 |    |                      |                    | 2.94         | -2.50 |
| 5  | -92.143              | Tyr 256            | 2.74         | -2.50 | 39 | -83.067              | Tyr 256            | 3.01         | -2.50 |
|    |                      |                    | 3.08         | -2.50 |    |                      |                    | 2.94         | -2.50 |
| 6  | -95.046              | -                  | -            | -     | 40 | -84.225              | Tyr 256            | 2.60         | -2.50 |
|    |                      |                    |              |       |    |                      |                    | 3.30         | -1.48 |
|    |                      |                    |              |       |    |                      |                    | 3.12         | -2.40 |
|    |                      |                    |              |       |    |                      | Asn 225            | 3.36         | -1.19 |
|    |                      |                    |              |       |    |                      |                    | 2.43         | -1.12 |
| 7  | -90.656              | Tyr 256            | 3.10         | -2.50 | 41 | -79.365              | Tyr 256            | 2.67         | -2.50 |
|    |                      |                    | 2.94         | -2.50 |    |                      | Asn 225            | 3.50         | -0.24 |
| 8  | -84.381              | Tyr 256            | 2.99         | -2.50 | 42 | -96.985              | Asn 225            | 3.31         | -0.61 |
|    |                      |                    | 2.89         | -2.50 |    |                      |                    | 3.10         | -1.32 |
| 9  | -89.649              | Tyr 256            | 3.10         | -2.34 | 43 | -74.541              | Asn 225            |              |       |
|    |                      | Asn 225            | 2.19         | 0.93  |    |                      |                    | 2.60         | -2.49 |
|    |                      |                    |              |       |    |                      |                    | 3.02         | -0.05 |
|    |                      |                    |              |       |    |                      | Gly 79             | 3.16         | -2.19 |
|    |                      |                    |              |       |    |                      |                    | 2.60         | -2.50 |
|    |                      |                    |              |       |    |                      | Tyr 256            | 3.02         | -0.93 |
| 10 | -84.295              | Tyr 256            | 2.92         | -2.50 | 44 | -83.134              | Tyr 256            | 3.1          | -2.5  |
|    |                      |                    | 3.07         | -2.50 |    |                      |                    |              |       |
| 11 | -84.611              | Tyr 256            | 2.95         | -2.50 | 45 | -78.98               | Tyr 256            | 2.95         | -2.5  |
|    |                      |                    | 2.87         | -2.50 |    |                      |                    | 2.74         | -2.5  |
| 12 | -83.999              | Tyr 256            | 2.85         | -2.50 | 46 | -81.058              | Asn 256            | 2.96         | -1.43 |
|    |                      |                    | 2.96         | -2.50 |    |                      |                    |              |       |
| 13 | -83.373              | Asn 225            | 3.01         | -1.50 | 47 | -88.304              | -                  | -            | -     |
| 14 | -87.445              | Tyr 256            | 2.95         | -2.50 | 48 | -82.930              | Tyr 256            | 2.99         | -2.49 |
|    |                      |                    | 2.84         | -2.50 |    |                      |                    |              |       |
| 15 | -94.888              | Tyr 256            | 2.93         | -2.50 | 49 | -84.899              | Asn 225            | 3.00         | -1.43 |
|    |                      |                    | 2.79         | -2.50 |    |                      |                    |              |       |
| 16 | -88.165              | Tyr 256            | 3.03         | -2.50 | 50 | -94.022              | Gly 79             | 2.75         | -0.69 |
|    |                      |                    | 2.99         | -2.50 |    |                      |                    | 2.63         | -0.57 |
| 17 | -94.674              | Asn 225            | 3.14         | -1.27 | 51 | -87.735              | Tyr 256            | 2.71         | -1.57 |
|    |                      | Gly 79             | 3.43         | -0.50 |    |                      |                    |              |       |

|    |         |         |      |       |    |                    |                    |      |       |
|----|---------|---------|------|-------|----|--------------------|--------------------|------|-------|
| 18 | -80.138 | Tyr 256 | 3.07 | -2.50 | 52 | -66.356            | Tyr 256            | 2.98 | -2.50 |
|    |         |         | 2.91 | -1.79 |    |                    |                    | 3.02 | -2.50 |
| 19 | -87.227 | Tyr 256 |      |       |    | -74.986            | Tyr 256            | 3.1  | -0.88 |
|    |         |         | 2.94 | -2.50 |    |                    |                    | 2.86 | -2.5  |
|    |         |         | 2.78 | -2.50 |    |                    |                    | 2.89 | -0.31 |
| 20 | -85.218 | Tyr 256 |      |       |    | -77.535<br>-81.348 | Tyr 256<br>Asn 225 | 3.1  | -0.29 |
|    |         |         | 3.03 | -2.50 |    |                    |                    | 2.69 | -2.5  |
|    |         |         | 2.98 | -2.50 |    |                    |                    | 3.12 | -2.42 |
| 21 | -91.061 | Tyr 256 |      |       |    |                    | Tyr 256            | 2.69 | -0.72 |
|    |         |         | 3.04 | -2.50 |    |                    |                    | 2.6  | -2.5  |
|    |         |         | 2.77 | -0.92 |    |                    |                    | 3.08 | -2.5  |
| 22 | -89.106 | Tyr 256 |      |       |    | -66.914            | Tyr 256            | 2.65 | -1.19 |
|    |         |         | 2.94 | -2.50 |    |                    |                    | 3.12 | -2.41 |
|    |         |         | 2.79 | -1.01 |    |                    |                    |      |       |
| 23 | -85.104 | Asn 225 | 3.10 | -1.40 | 57 | -66.913            | -                  | -    | -     |
|    |         | Gly 79  | 3.43 | -0.43 |    |                    |                    |      |       |
| 24 | -83.580 | Tyr 256 | 3.11 | -2.44 | 58 | -69.657            | Tyr 256            | 3.16 | -2.18 |
|    |         |         |      |       |    |                    |                    | 2.75 | -1.29 |
| 25 | -96.427 | Asn 225 | 3.06 | -1.87 | 59 | -70.068            | Tyr 256            | 2.87 | -2.50 |
|    |         |         |      |       |    |                    |                    | 3.09 | -0.04 |
|    |         |         |      |       |    |                    |                    | 3.15 | -2.25 |
| 26 | -87.100 | -       | -    | -     | 60 | -76.338            | Tyr 256            | 2.80 | -1.20 |
|    |         |         |      |       |    |                    |                    | 2.89 | -2.50 |
| 27 | -86.191 | -       | -    | -     | 61 | -72.644            | Tyr 256            | 3.07 | -0.13 |
|    |         |         |      |       |    |                    |                    |      |       |
| 28 | -85.924 | Tyr 256 | 2.92 | -2.50 | 62 | -78.314            | Tyr 256            | 3.08 | -2.50 |
|    |         |         | 2.88 | -2.50 |    |                    |                    |      |       |
| 29 | -84.210 | Tyr 256 | 2.74 | -0.14 | 63 | -109.969           | Asn 225            | 3.12 | -1.78 |
|    |         |         |      |       |    |                    |                    | 3.44 | -0.78 |
|    |         |         |      |       |    |                    |                    | 3.28 | -1.58 |
|    |         |         |      |       |    |                    | Tyr 256            | 2.97 | -2.50 |
|    |         |         |      |       |    |                    |                    | 3.07 | -2.50 |
| 30 | -89.359 | Tyr 256 | 3.00 | -2.50 | 64 | -119.504           | Tyr 256            | 2.98 | -2.45 |
|    |         |         | 3.01 | -2.50 |    |                    |                    |      |       |
| 31 | -95.517 | Tyr 256 | 2.77 | -2.50 | 65 | -108.703           | Gly 79             | 2.71 | -2.71 |
|    |         |         |      |       |    |                    |                    | 2.84 | -1.70 |
|    |         |         |      |       |    |                    |                    | 2.68 | -2.50 |
|    |         |         | 3.10 | -2.50 |    |                    | Tyr 256            | 3.10 | -2.49 |
|    |         |         |      |       |    |                    |                    |      |       |
| 32 | -87.559 | Tyr 256 | 2.96 | -2.50 | 66 | -108.761           |                    | 3.28 | -1.60 |
|    |         |         |      |       |    |                    |                    | 2.70 | -2.50 |
|    |         |         |      |       |    |                    | Tyr 256            | 3.14 | -2.21 |
|    |         |         | 2.73 | -2.50 |    |                    | Asn 225            | 3.01 | -1.66 |
|    |         |         |      |       |    |                    |                    |      |       |
| 33 | -80.096 | Tyr 256 | 3.02 | -2.50 | 67 | -121.426           | Tyr 256            | 3.08 | -2.50 |
|    |         |         | 3.01 | -2.50 |    |                    |                    | 3.00 | -2.46 |
| 34 | -87.434 | Try 256 | 2.98 | -2.50 | 68 | -113.611           | Asn 225            | 3.12 | -1.65 |
|    |         |         |      |       |    |                    |                    | 3.23 | -1.85 |
|    |         |         |      |       |    |                    |                    | 2.87 | -2.50 |
|    |         |         | 2.82 | -2.50 |    |                    | Tyr 256            | 3.17 | -1.91 |
|    |         |         |      |       |    |                    |                    |      |       |

Table S21. ADME parameters

| ID | MW     | H-bond<br>acceptors | H-bond<br>donors | TPSA   | Pharmacokinetics   |       |       |                |      |    |     |      |     |     |     |       |                     |          |       | Bio-<br>availability<br>Score |       |      |        |
|----|--------|---------------------|------------------|--------|--------------------|-------|-------|----------------|------|----|-----|------|-----|-----|-----|-------|---------------------|----------|-------|-------------------------------|-------|------|--------|
|    |        |                     |                  |        | Solubility (Log S) |       |       |                |      | GI | Pgp | CYP  |     |     |     |       | log<br>Kp<br>(cm/s) | Lipinski | Ghose |                               | Veber | Egan | Muegge |
|    |        |                     |                  |        | Log P              |       |       |                | 1A2  |    |     | 2C19 | 2C9 | 2D6 | 3A4 |       |                     |          |       |                               |       |      |        |
|    |        |                     |                  |        |                    | ESOL  | Ali   | Silicos-<br>IT |      |    |     |      |     |     |     |       |                     |          |       |                               |       |      |        |
| 1  | 283.71 | 2                   | 1                | 46.17  | 3.06               | -4.57 | -4.9  | -6.43          | High | No | Yes | Yes  | Yes | Yes | Yes | -5.03 | 0                   | 0        | 0     | 0                             | 0     | 0.55 |        |
| 2  | 313.74 | 3                   | 1                | 55.4   | 3.07               | -4.63 | -5.06 | -6.55          | High | No | Yes | Yes  | Yes | Yes | Yes | -5.24 | 0                   | 0        | 0     | 0                             | 0     | 0.55 |        |
| 3  | 313.74 | 3                   | 1                | 55.4   | 3.05               | -4.63 | -5.06 | -6.55          | High | No | Yes | Yes  | Yes | Yes | Yes | -5.24 | 0                   | 0        | 0     | 0                             | 0     | 0.55 |        |
| 4  | 313.74 | 3                   | 1                | 55.4   | 3.05               | -4.63 | -5.06 | -6.55          | High | No | Yes | Yes  | Yes | Yes | Yes | -5.24 | 0                   | 0        | 0     | 0                             | 0     | 0.55 |        |
| 5  | 327.76 | 3                   | 1                | 55.4   | 3.4                | -4.87 | -5.45 | -6.95          | High | No | Yes | Yes  | Yes | Yes | Yes | -5.06 | 0                   | 0        | 0     | 0                             | 0     | 0.55 |        |
| 6  | 326.77 | 3                   | 0                | 43.37  | 3.9                | -4.86 | -5.19 | -7.3           | High | No | Yes | Yes  | Yes | Yes | Yes | -5.06 | 0                   | 0        | 0     | 0                             | 0     | 0.55 |        |
| 7  | 327.76 | 3                   | 1                | 55.4   | 3.38               | -4.87 | -5.45 | -6.95          | High | No | Yes | Yes  | Yes | Yes | Yes | -5.06 | 0                   | 0        | 0     | 0                             | 0     | 0.55 |        |
| 8  | 301.7  | 3                   | 1                | 46.17  | 3.41               | -4.72 | -5    | -6.71          | High | No | Yes | Yes  | Yes | Yes | Yes | -5.07 | 0                   | 0        | 0     | 0                             | 0     | 0.55 |        |
| 9  | 301.7  | 3                   | 1                | 46.17  | 3.38               | -4.72 | -5    | -6.71          | High | No | Yes | Yes  | Yes | Yes | Yes | -5.07 | 0                   | 0        | 0     | 0                             | 0     | 0.55 |        |
| 10 | 301.7  | 3                   | 1                | 46.17  | 3.38               | -4.72 | -5    | -6.71          | High | No | Yes | Yes  | Yes | Yes | Yes | -5.07 | 0                   | 0        | 0     | 0                             | 0     | 0.55 |        |
| 11 | 318.15 | 2                   | 1                | 46.17  | 3.62               | -5.16 | -5.55 | -7.04          | High | No | Yes | Yes  | Yes | No  | Yes | -4.8  | 0                   | 0        | 0     | 0                             | 0     | 0.55 |        |
| 12 | 318.15 | 2                   | 1                | 46.17  | 3.62               | -5.16 | -5.55 | -7.04          | High | No | Yes | Yes  | Yes | No  | Yes | -4.8  | 0                   | 0        | 0     | 0                             | 0     | 0.55 |        |
| 13 | 318.15 | 2                   | 1                | 46.17  | 3.6                | -5.16 | -5.55 | -7.04          | High | No | Yes | Yes  | Yes | No  | Yes | -4.8  | 0                   | 0        | 0     | 0                             | 0     | 0.55 |        |
| 14 | 328.71 | 4                   | 1                | 91.99  | 2.47               | -4.96 | -6.26 | -5.79          | High | No | Yes | Yes  | Yes | No  | Yes | -5.04 | 0                   | 0        | 0     | 0                             | 0     | 0.55 |        |
| 15 | 328.71 | 4                   | 1                | 91.99  | 2.3                | -4.62 | -5.69 | -5.79          | High | No | Yes | Yes  | Yes | No  | Yes | -5.43 | 0                   | 0        | 0     | 0                             | 0     | 0.55 |        |
| 16 | 328.71 | 4                   | 1                | 91.99  | 2.3                | -4.62 | -5.69 | -5.79          | High | No | Yes | Yes  | Yes | No  | Yes | -5.43 | 0                   | 0        | 0     | 0                             | 0     | 0.55 |        |
| 17 | 373.7  | 6                   | 1                | 137.81 | 1.68               | -5.03 | -7.04 | -5.14          | Low  | No | Yes | Yes  | Yes | Yes | Yes | -5.43 | 0                   | 0        | 0     | 1                             | 0     | 0.55 |        |
| 18 | 297.74 | 2                   | 1                | 46.17  | 3.41               | -4.86 | -5.27 | -6.82          | High | No | Yes | Yes  | Yes | Yes | Yes | -4.86 | 0                   | 0        | 0     | 0                             | 0     | 0.55 |        |
| 19 | 297.74 | 2                   | 1                | 46.17  | 3.42               | -4.86 | -5.27 | -6.82          | High | No | Yes | Yes  | Yes | Yes | Yes | -4.86 | 0                   | 0        | 0     | 0                             | 0     | 0.55 |        |
| 20 | 297.74 | 2                   | 1                | 46.17  | 3.4                | -4.86 | -5.27 | -6.82          | High | No | Yes | Yes  | Yes | Yes | Yes | -4.86 | 0                   | 0        | 0     | 0                             | 0     | 0.55 |        |
| 21 | 311.76 | 2                   | 1                | 46.17  | 3.7                | -5.14 | -5.73 | -7.21          | High | No | Yes | Yes  | Yes | Yes | Yes | -4.64 | 0                   | 0        | 0     | 0                             | 1     | 0.55 |        |
| 22 | 311.76 | 2                   | 1                | 46.17  | 3.7                | -5.14 | -5.73 | -7.21          | High | No | Yes | Yes  | Yes | Yes | Yes | -4.64 | 0                   | 0        | 0     | 0                             | 1     | 0.55 |        |
| 23 | 311.76 | 2                   | 1                | 46.17  | 3.7                | -5.14 | -5.73 | -7.21          | High | No | Yes | Yes  | Yes | Yes | Yes | -4.64 | 0                   | 0        | 0     | 0                             | 1     | 0.55 |        |
| 24 | 325.79 | 2                   | 1                | 46.17  | 4.01               | -5.42 | -6.07 | -7.24          | High | No | Yes | Yes  | Yes | No  | Yes | -4.49 | 0                   | 0        | 0     | 0                             | 1     | 0.55 |        |
| 25 | 325.79 | 2                   | 1                | 46.17  | 4.02               | -5.42 | -6.07 | -7.24          | High | No | Yes | Yes  | Yes | No  | Yes | -4.49 | 0                   | 0        | 0     | 0                             | 1     | 0.55 |        |



|    |        |   |   |        |      |       |       |       |      |    |     |     |     |     |     |       |   |   |   |   |   |      |
|----|--------|---|---|--------|------|-------|-------|-------|------|----|-----|-----|-----|-----|-----|-------|---|---|---|---|---|------|
| 26 | 325.79 | 2 | 1 | 46.17  | 4.01 | -5.42 | -6.07 | -7.24 | High | No | Yes | Yes | Yes | No  | Yes | -4.49 | 0 | 0 | 0 | 0 | 1 | 0.55 |
| 27 | 264.28 | 2 | 2 | 72.19  | 2.05 | -3.62 | -4.09 | -5.47 | High | No | Yes | Yes | Yes | No  | Yes | -5.85 | 0 | 0 | 0 | 0 | 0 | 0.55 |
| 28 | 294.3  | 3 | 2 | 81.42  | 1.95 | -3.57 | -4.06 | -5.58 | High | No | Yes | Yes | Yes | No  | Yes | -6.18 | 0 | 0 | 0 | 0 | 0 | 0.55 |
| 29 | 294.3  | 3 | 2 | 81.42  | 1.94 | -3.68 | -4.25 | -5.58 | High | No | Yes | Yes | Yes | No  | Yes | -6.05 | 0 | 0 | 0 | 0 | 0 | 0.55 |
| 30 | 294.3  | 3 | 2 | 81.42  | 1.95 | -3.68 | -4.25 | -5.58 | High | No | Yes | Yes | Yes | No  | Yes | -6.05 | 0 | 0 | 0 | 0 | 0 | 0.55 |
| 31 | 308.33 | 3 | 2 | 81.42  | 2.26 | -3.81 | -4.45 | -5.98 | High | No | Yes | Yes | Yes | Yes | Yes | -6    | 0 | 0 | 0 | 0 | 0 | 0.55 |
| 32 | 308.33 | 3 | 2 | 81.42  | 2.23 | -3.92 | -4.63 | -5.98 | High | No | Yes | Yes | Yes | Yes | Yes | -5.87 | 0 | 0 | 0 | 0 | 0 | 0.55 |
| 33 | 308.33 | 3 | 2 | 81.42  | 2.27 | -3.92 | -4.63 | -5.98 | High | No | Yes | Yes | Yes | Yes | Yes | -5.87 | 0 | 0 | 0 | 0 | 0 | 0.55 |
| 34 | 282.27 | 3 | 2 | 72.19  | 2.28 | -3.78 | -4.19 | -5.74 | High | No | Yes | No  | No  | Yes | Yes | -5.88 | 0 | 0 | 0 | 0 | 0 | 0.55 |
| 35 | 282.27 | 3 | 2 | 72.19  | 2.26 | -3.78 | -4.19 | -5.74 | High | No | Yes | No  | No  | Yes | Yes | -5.88 | 0 | 0 | 0 | 0 | 0 | 0.55 |
| 36 | 282.27 | 3 | 2 | 72.19  | 2.25 | -3.78 | -4.19 | -5.74 | High | No | Yes | No  | No  | Yes | Yes | -5.88 | 0 | 0 | 0 | 0 | 0 | 0.55 |
| 37 | 298.72 | 2 | 2 | 72.19  | 2.49 | -4.21 | -4.74 | -6.07 | High | No | Yes | Yes | Yes | Yes | Yes | -5.61 | 0 | 0 | 0 | 0 | 0 | 0.55 |
| 38 | 298.72 | 2 | 2 | 72.19  | 2.49 | -4.21 | -4.74 | -6.07 | High | No | Yes | Yes | Yes | Yes | Yes | -5.61 | 0 | 0 | 0 | 0 | 0 | 0.55 |
| 39 | 298.72 | 2 | 2 | 72.19  | 2.48 | -4.21 | -4.74 | -6.07 | High | No | Yes | Yes | Yes | Yes | Yes | -5.61 | 0 | 0 | 0 | 0 | 0 | 0.55 |
| 40 | 309.28 | 4 | 2 | 118.01 | 1.27 | -3.9  | -5.26 | -4.83 | High | No | Yes | No  | Yes | No  | Yes | -5.98 | 0 | 0 | 0 | 0 | 0 | 0.55 |
| 41 | 309.28 | 4 | 2 | 118.01 | 1.22 | -3.67 | -4.87 | -4.83 | High | No | Yes | No  | Yes | No  | Yes | -6.24 | 0 | 0 | 0 | 0 | 0 | 0.55 |
| 42 | 309.28 | 4 | 2 | 118.01 | 1.2  | -3.67 | -4.87 | -4.83 | High | No | Yes | No  | Yes | No  | Yes | -6.24 | 0 | 0 | 0 | 0 | 0 | 0.55 |
| 43 | 354.27 | 6 | 2 | 163.83 | 0.49 | -3.97 | -6.04 | -4.18 | Low  | No | No  | No  | Yes | No  | Yes | -6.37 | 0 | 0 | 1 | 1 | 1 | 0.55 |
| 44 | 292.33 | 2 | 2 | 72.19  | 2.57 | -4.2  | -4.92 | -6.25 | High | No | Yes | Yes | Yes | Yes | Yes | -5.45 | 0 | 0 | 0 | 0 | 0 | 0.55 |
| 45 | 306.36 | 2 | 2 | 72.19  | 2.86 | -4.36 | -5.07 | -6.27 | High | No | Yes | Yes | Yes | Yes | Yes | -5.43 | 0 | 0 | 0 | 0 | 0 | 0.55 |
| 46 | 306.36 | 2 | 2 | 72.19  | 2.89 | -4.47 | -5.26 | -6.27 | High | No | Yes | Yes | Yes | Yes | Yes | -5.3  | 0 | 0 | 0 | 0 | 0 | 0.55 |
| 47 | 306.36 | 2 | 2 | 72.19  | 2.87 | -4.47 | -5.26 | -6.27 | High | No | Yes | Yes | Yes | Yes | Yes | -5.3  | 0 | 0 | 0 | 0 | 0 | 0.55 |
| 48 | 278.31 | 2 | 2 | 72.19  | 2.26 | -3.8  | -4.27 | -5.85 | High | No | Yes | Yes | Yes | Yes | Yes | -5.8  | 0 | 0 | 0 | 0 | 0 | 0.55 |
| 49 | 278.31 | 2 | 2 | 72.19  | 2.29 | -3.92 | -4.47 | -5.85 | High | No | Yes | Yes | Yes | Yes | Yes | -5.67 | 0 | 0 | 0 | 0 | 0 | 0.55 |
| 50 | 278.31 | 2 | 2 | 72.19  | 2.28 | -3.92 | -4.47 | -5.85 | High | No | Yes | Yes | Yes | Yes | Yes | -5.67 | 0 | 0 | 0 | 0 | 0 | 0.55 |
| 51 | 292.33 | 2 | 2 | 72.19  | 2.56 | -4.08 | -4.73 | -6.25 | High | No | Yes | Yes | Yes | Yes | Yes | -5.58 | 0 | 0 | 0 | 0 | 0 | 0.55 |
| 52 | 292.33 | 2 | 2 | 72.19  | 2.58 | -4.2  | -4.92 | -6.25 | High | No | Yes | Yes | Yes | Yes | Yes | -5.45 | 0 | 0 | 0 | 0 | 0 | 0.55 |
| 53 | 290.27 | 5 | 0 | 69.15  | 2.21 | -3.87 | -3.9  | -6.29 | High | No | Yes | No  | Yes | Yes | Yes | -6.09 | 0 | 0 | 0 | 0 | 0 | 0.55 |
| 54 | 290.27 | 5 | 0 | 69.15  | 2.25 | -3.87 | -3.9  | -6.29 | High | No | Yes | No  | Yes | Yes | Yes | -6.09 | 0 | 0 | 0 | 0 | 0 | 0.55 |
| 55 | 304.3  | 5 | 0 | 69.15  | 2.55 | -4.1  | -4.28 | -6.69 | High | No | Yes | No  | Yes | No  | Yes | -5.91 | 0 | 0 | 0 | 0 | 0 | 0.55 |
| 56 | 304.3  | 5 | 0 | 69.15  | 2.56 | -4.1  | -4.28 | -6.69 | High | No | Yes | No  | Yes | No  | Yes | -5.91 | 0 | 0 | 0 | 0 | 0 | 0.55 |
| 57 | 274.27 | 4 | 0 | 59.92  | 2.59 | -4.11 | -4.11 | -6.56 | High | No | Yes | No  | No  | No  | Yes | -5.72 | 0 | 0 | 0 | 0 | 0 | 0.55 |
| 58 | 274.27 | 4 | 0 | 59.92  | 2.62 | -4.11 | -4.11 | -6.56 | High | No | Yes | No  | Yes | No  | Yes | -5.72 | 0 | 0 | 0 | 0 | 0 | 0.55 |
| 59 | 288.3  | 4 | 0 | 59.92  | 2.88 | -4.38 | -4.57 | -6.96 | High | No | Yes | Yes | Yes | No  | Yes | -5.49 | 0 | 0 | 0 | 0 | 0 | 0.55 |

|    |        |   |   |       |      |       |       |       |      |    |     |     |     |    |     |       |   |   |   |   |   |      |
|----|--------|---|---|-------|------|-------|-------|-------|------|----|-----|-----|-----|----|-----|-------|---|---|---|---|---|------|
| 60 | 288.3  | 4 | 0 | 59.92 | 2.88 | -4.38 | -4.57 | -6.96 | High | No | Yes | Yes | Yes | No | Yes | -5.49 | 0 | 0 | 0 | 0 | 0 | 0.55 |
| 61 | 302.33 | 4 | 0 | 59.92 | 3.19 | -4.65 | -4.91 | -6.99 | High | No | Yes | Yes | Yes | No | Yes | -5.34 | 0 | 0 | 0 | 0 | 0 | 0.55 |
| 62 | 302.33 | 4 | 0 | 59.92 | 3.19 | -4.65 | -4.91 | -6.99 | High | No | Yes | Yes | Yes | No | Yes | -5.34 | 0 | 0 | 0 | 0 | 0 | 0.55 |
| 63 | 364.79 | 4 | 1 | 76.88 | 2.65 | -4.49 | -4.74 | -6.95 | High | No | Yes | Yes | Yes | No | Yes | -6.08 | 0 | 0 | 0 | 0 | 0 | 0.55 |
| 64 | 382.78 | 5 | 1 | 76.88 | 3.01 | -4.65 | -4.84 | -7.22 | High | No | Yes | Yes | Yes | No | Yes | -6.12 | 0 | 0 | 0 | 0 | 0 | 0.55 |
| 65 | 382.78 | 5 | 1 | 76.88 | 3.01 | -4.65 | -4.84 | -7.22 | High | No | Yes | Yes | Yes | No | Yes | -6.12 | 0 | 0 | 0 | 0 | 0 | 0.55 |
| 66 | 382.78 | 5 | 1 | 76.88 | 2.98 | -4.65 | -4.84 | -7.22 | High | No | Yes | Yes | Yes | No | Yes | -6.12 | 0 | 0 | 0 | 0 | 0 | 0.55 |
| 67 | 400.77 | 6 | 1 | 76.88 | 3.3  | -4.8  | -4.94 | -7.48 | High | No | Yes | Yes | Yes | No | Yes | -6.16 | 0 | 0 | 0 | 0 | 0 | 0.55 |
| 68 | 400.77 | 6 | 1 | 76.88 | 3.28 | -4.8  | -4.94 | -7.48 | High | No | Yes | Yes | Yes | No | Yes | -6.16 | 0 | 0 | 0 | 0 | 0 | 0.55 |
